# Supplementary material for: Formation of N-heterocycles by the reaction of thiols with glyoxamides: exploring a connective Pummerer-type cyclisation
Source: Royal Society of Chemistry journal article supplement (doi:10.1039/b816608k), 2008-12-13
Supplement: b816608k.pdf [file b816608k.pdf]

# Formation of *N*-heterocycles by the reaction of thiols with glyoxamides: Exploring a connective Pummerer-type cyclisation

Marc Miller,<sup>a</sup> Johannes Vogel,<sup>a</sup> William Tsang,<sup>a</sup> Andrew Merrit<sup>b</sup> and  
David J. Procter\*<sup>a</sup>

<sup>a</sup>The School of Chemistry, University of Manchester, Oxford Road, Manchester, M13  
9PL, UK.

<sup>b</sup>GlaxoSmithKline, Gunnelswood Rd., Stevenage, SG1 2NY, UK.

[David.j.procter@manchester.ac.uk](mailto:David.j.procter@manchester.ac.uk)

## Supporting Information

### Contents

Additional Experimental procedures and characterisation data S2

### 1-Methyl-3-ethylacetylsulfanyl-1,3-dihydroindol-2-one **14**<sup>1</sup>

As for general procedure A. Glyoxamide **9** (108 mg, 0.67 mmol, 1 eq), on treatment with ethylthioglycolate (73  $\mu$ l, 0.67 mmol, 1 eq), TFAA (847  $\mu$ l, 5.99 mmol, 9 eq) and  $\text{BF}_3 \cdot \text{OEt}_2$  (400  $\mu$ l, 3.33 mmol, 5 eq), and after purification by column chromatography using 30% EtOAc in petroleum ether as eluant, gave **14** (120 mg, 0.45 mmol, 67% from hydroxyamide, 2 steps) as an orange oil.  $\delta_{\text{H}}$  (500 MHz,  $\text{CDCl}_3$ ) 1.18 (3H, t,  $J = 7.2$  Hz,  $\text{CH}_3\text{CH}_2$ ), 3.14 (3H, s,  $\text{CH}_3\text{N}$ ), 3.19 (1H, d,  $J = 15.5$  Hz, 1H of  $\text{CH}_2\text{S}$ ), 3.73 (1H, d,  $J = 15.5$  Hz, 1H of  $\text{CH}_2\text{S}$ ), 4.08 (2H, q,  $J = 7.2$  Hz,  $\text{CH}_2\text{CH}_3$ ), 4.48 (1H, s,  $\text{CHS}$ ), 6.76 (1H, d,  $J = 7.8$  Hz,  $\text{ArCH}$ ), 7.01 (1H, dt,  $J = 0.8, 7.6$  Hz,  $\text{ArCH}$ ), 7.25 (1H, t,  $J = 7.8$  Hz,  $\text{ArCH}$ ) and 7.32 (1H, d, 7.4 Hz,  $\text{ArCH}$ ).  $\delta_{\text{C}}$  (75 MHz,  $\text{CDCl}_3$ ) 14.4 ( $\text{CH}_3\text{CH}_2$ ), 27.0 ( $\text{CH}_3\text{N}$ ), 31.8 ( $\text{CH}_2\text{S}$ ), 43.9 ( $\text{CHS}$ ), 61.8 ( $\text{CH}_2\text{CH}_3$ ), 108.6 ( $\text{ArCH}$ ), 123.2 ( $\text{ArCH}$ ), 125.0 ( $\text{ArC}$ ), 125.5 ( $\text{ArCH}$ ), 129.6 ( $\text{ArCH}$ ), 144.4 ( $\text{ArC}$ ), 170.2 ( $\text{C}=\text{O}$  amide) and 175.3 ( $\text{C}=\text{O}$  ester).  $\nu_{\text{max}}/(\text{cm}^{-1})$  2985, 1714 ( $\text{C}=\text{O}$ ), 1465, 1358, 1271, 1131 and 924.  $m/z$  ( $\text{CI}^+$  mode) 283 ( $(\text{M}+\text{NH}_4)^+$ , 18%) 266 ( $(\text{M}+\text{H})^+$ , 100%), 238 (21%), 179 (38%), 166. (17%) and 148 (12%).  $m/z$  ( $\text{M}+\text{NH}_4^+$ ) 283.1105,  $\text{C}_{13}\text{H}_{19}\text{O}_3\text{N}_2\text{S}$  requires 283.1111.

### 5-Bromo-3-phenylsulfanyl-1-propyl-1,3-dihydroindol-2-one **15**

As for general procedure A. Glyoxamide **10** (167 mg, 0.62 mmol, 1 eq) on treatment with thiophenol (64  $\mu$ l, 0.62 mmol, 1 eq), TFAA (0.79 ml, 5.57 mmol, 9 eq) and  $\text{BF}_3 \cdot \text{OEt}_2$  (432  $\mu$ l, 3.09 mmol, 5 eq) and after purification by column chromatography using 10% EtOAc in petroleum ether as eluant gave **15** (187 mg, 0.51 mmol, 83% from glyoxamide) as a red oil.  $\delta_{\text{H}}$  (300 MHz,  $\text{CDCl}_3$ ) 0.79 (3H, t,  $J = 7.4$  Hz,  $\text{CH}_3$ ), 1.33-1.44 (2H, m,  $\text{CH}_2$ ), 3.31-3.40 (1H, m, 1H of  $\text{CH}_2\text{N}$ ), 3.50-

<sup>1</sup> H. Ishibashi, M. Okada, A. Akiyama, K. Nomura and M. Ikeda, *J. Heterocyclic Chem.*, 1986, 1163.

3.60 (1H, m, 1H of  $CH_2N$ ), 4.50 (1H, s,  $CHS$ ), 6.52 (1H, d,  $J = 8.3$  Hz,  $ArH$ ), 7.15-7.37 (6H, m,  $6 \times ArH$ ) and 7.52-7.54 (1H, m,  $ArH$ ).  $\delta_C$  (75 MHz,  $CDCl_3$ ) 11.5 ( $CH_3$ ), 20.7 ( $CH_2$ ), 42.1 ( $CH_2N$ ), 49.2 ( $CHS$ ), 110.0 ( $ArCH$ ), 115.2 ( $ArC$ ), 128.7 ( $ArCH$ ), 128.8 ( $ArCH$ ), 128.8 ( $ArCH$ ), 128.9 ( $ArCH$ ), 129.0 ( $ArCH$ ), 132.0 ( $ArC$ ), 132.9 ( $ArC$ ), 134.0 ( $ArCH$ ), 135.0 ( $ArCH$ ), 142.8 ( $ArC$ ) and 173.6 ( $C=O$ ).  $\nu_{max}/(cm^{-1})$  3055, 2949, 2860, 1681 ( $C=O$ ), 1450, 1327, 1080, 879 and 725.  $m/z$  ( $CI^+$  mode), 379 ( $M+NH_4^+$  50%), 362 ( $(M+H)^+$ , 100%), 284 (28%), 271 (34%), 254 (52%), 193 (22%) and 176 (40%).  $m/z$  ( $M$ ) 362.0210,  $C_{17}H_{17}ONBrS$  requires 362.0209.

### **5-Bromo-3-ethylacetylsulfanyl-1-propyl-1,3-dihydroindol-2-one 16**

As for general procedure A. Glyoxamide **10** (164 mg, 0.61 mmol, 1 eq) on treatment with ethylthioglycolate (67  $\mu$ l, 0.61 mmol, 1 eq), TFAA (0.77 ml, 5.47 mmol, 9 eq) and  $BF_3 \cdot OEt_2$  (425  $\mu$ l, 3.04 mmol, 5 eq) and after purification by column chromatography using 10% EtOAc in petroleum ether as eluant gave **16** (179 mg, 0.48 mmol, 79% from hydroxyamide, 2 steps) as an orange oil.  $\delta_H$  (500 MHz,  $CDCl_3$ ) 0.90 (3H, t,  $J = 7.6$  Hz,  $CH_3$ ), 1.21 (3H, t,  $J = 7.3$  Hz,  $CH_3CH_2C=O$ ), 1.68 (2H, m,  $CH_2$ ), 3.18 (1H, d,  $J = 15.5$  Hz, 1H of  $CH_2S$ ), 3.58 (2H, m,  $CH_2$ ), 3.77 (1H, d,  $J = 15.5$  Hz, 1H of  $CH_2S$ ), 4.09 (2H, q,  $J = 7.3$  Hz,  $CH_2CH_3$ ), 4.48 (1H, s,  $CHS$ ), 6.65 (1H, d,  $J = 8.5$  Hz,  $ArH$ ), 7.35 (1H, dd,  $J = 1.9, 8.5$  Hz,  $ArH$ ) and 7.45 (1H, s,  $ArH$ ).  $\delta_C$  (75 MHz,  $CDCl_3$ ) 11.6 ( $CH_3$ ), 14.4 ( $CH_3CH_2$ ), 20.9 ( $CH_2$ ), 31.8 ( $CH_2S$ ), 42.2 ( $CH_2N$ ), 43.6 ( $CHS$ ), 61.9 ( $CH_2CH_3$ ), 110.3 ( $ArCH$ ), 115.4 ( $ArC$ ), 127.4 ( $ArC$ ), 128.8 ( $ArCH$ ), 132.4 ( $ArCH$ ), 142.9 ( $ArC$ ), 170.0 ( $C=O$  amide) and 174.7 ( $C=O$  ester).  $\nu_{max}/(cm^{-1})$  3421, 3058, 2969, 2933, 2876, 1725, 1606, 1481, 1339, 1268, 1180, 1028, 811 and 736.  $m/z$  ( $ES^+$  mode) 578.1 (32%)

and 394.1 ((M+Na)<sup>+</sup>, 100%). *m/z* (M+Na) 394.0069, C<sub>15</sub>H<sub>18</sub>O<sub>3</sub>NBrSNa requires 394.0083.

### **5-Fluoro-3-phenylsulfanyl-1-propyl-1,3-dihydroindol-2-one 17**

As for general procedure A Glyoxamide **11** (167 mg, 0.80 mmol, 1 eq), on treatment with thiophenol (81  $\mu$ l, 0.80 mmol, 1 eq), TFAA (1.01 ml, 7.18 mmol, 9 eq) and BF<sub>3</sub>•OEt<sub>2</sub> (558  $\mu$ l, 3.99 mmol, 5 eq), and purification by column chromatography using 10% EtOAc in petroleum ether as eluant, gave **17** (168 mg, 0.56 mmol, 70% from hydroxyamide, 2steps) as a orange oil.  $\delta_{\text{H}}$  (300 MHz, CDCl<sub>3</sub>) 0.71 (3H, t, J = 7.4 Hz, CH<sub>3</sub>), 1.29-1.35 (3H, m, CH<sub>2</sub>), 3.26-3.31 (1H, m, 1H of CH<sub>2</sub>N), 3.45-3.51, (1H, m, 1H of CH<sub>2</sub>N), 4.42 (1H, s, CHS), 6.74 (1H, dd, J = 4.1, 8.5 Hz, ArH), 6.98 (1H, dt, J = 2.7, 8.7 Hz, ArH) and 7.15 (1H, ddd, J = 0.9, 2.7, 7.5 Hz, ArH).  $\delta_{\text{C}}$  (75 MHz, CDCl<sub>3</sub>) 11.5 (CH<sub>3</sub>), 20.7 (CH<sub>2</sub>), 42.1 (CH<sub>2</sub>N), 49.5 (CHS), 109.0 (ArCH, d, J = 8.1 Hz), 113.4 (ArCH, d, J = 25.3 Hz), 115.5 (ArCH, d, J = 23.6 Hz), 128.3 (ArC, d, J = 8.6 Hz), 128.9 (2  $\times$  ArCH), 129.2 (ArCH), 130.3 (ArC), 134.9 (2  $\times$  ArCH), 139.7 (ArC, d, J = 2.1 Hz), 159.2 (ArCF, d, J = 240.7 Hz) and 173.9 (C=O amide).  $\nu_{\text{max}}$ /(cm<sup>-1</sup>) 3057, 2947, 2854, 1699 (C=O), 1465, 1342, 1188, 1124, 811 and 746. *m/z* (EI<sup>+</sup> mode) 301 (M<sup>+</sup> 12%), 192 (100%), 164 (11%), 109 (16%) and 65 (7%). *m/z* (M+H) 302.1012, C<sub>17</sub>H<sub>17</sub>ONFS requires 302.1009.

### **3-(4-Bromo-benzylsulfanyl)-5-fluoro-1-propyl-1,3-dihydro-indol-2-one 18**

As for general procedure A Glyoxamide **11** (236 mg, 1.13 mmol, 1 eq), on treatment with 4-bromo benzyl mercaptan (230 mg, 1.13 mmol, 1 eq), TFAA (1.43 ml, 10.2 mmol, 9 eq) and BF<sub>3</sub>•OEt<sub>2</sub> (695  $\mu$ l, 5.65 mmol, 5 eq), and

purification by column chromatography using 12.5% EtOAc in petroleum ether as eluant, gave **18** (322 mg, 0.81 mmol, 72% from hydroxyamide, 2 steps) as a dark orange oil.  $\delta_{\text{H}}$  (500 MHz,  $\text{CDCl}_3$ ) 0.89 (3H, t,  $J = 7.6$  Hz,  $\text{CH}_3$ ), 1.59 (2H, sextet,  $J = 7.6$  Hz,  $\text{CH}_2$ ), 3.47-3.56 (2H, m,  $\text{CH}_2\text{N}$ ), 3.60 (1H, d,  $J = 13.2$  Hz, 1H of  $\text{CH}_2\text{Ph}$ ), 4.03 (1H, s,  $\text{CHS}$ ), 4.06 (1H, d,  $J = 13.2$  Hz, 1H of  $\text{CH}_2\text{Ph}$ ), 6.63 (1H, dd,  $J = 4.1, 8.5$  Hz,  $\text{ArH}$ ), 6.88-6.94 (2H, m,  $2 \times \text{ArH}$ ), 7.15 (2H, d,  $J = 8.5$  Hz,  $2 \times \text{ArH}$ ) and 7.33 (2H, d,  $J = 8.5$  Hz,  $2 \times \text{ArH}$ ).  $\delta_{\text{C}}$  (75 MHz,  $\text{CDCl}_3$ ) 11.6 ( $\text{CH}_3$ ), 21.0 ( $\text{CH}_2$ ), 33.8 ( $\text{CH}_2\text{S}$ ), 42.2 ( $\text{CH}_2\text{N}$ ), 43.5 ( $\text{CHS}$ ), 109.2 ( $\text{ArCH}$ , d,  $J = 8.3$  Hz), 113.3 ( $\text{ArCH}$ , d,  $J = 24.9$  Hz), 115.5 ( $\text{ArCH}$ , d,  $J = 23.5$  Hz), 121.6 ( $\text{ArC}$ ), 127.2 ( $\text{ArC}$ , d,  $J = 8.3$  Hz), 131.2 ( $2 \times \text{ArCH}$ ), 131.9 ( $2 \times \text{ArCH}$ ), 136.4 ( $\text{ArC}$ ), 139.7 ( $\text{ArC}$ ), 159.3 ( $\text{ArCF}$ , d,  $J = 239.8$  Hz) and 175.3 ( $\text{C=O}$ ).  $\nu_{\text{max}}/(\text{cm}^{-1})$  3048, 2965, 2931, 2874, 1711 ( $\text{C=O}$ ), 1488, 1383, 1267, 1199, 1070, 872.  $m/z$  (ES+ mode) 454 (29%), 417 ( $(\text{M}+\text{Na})^+$  100%), 396 (61%), 393 (45%), 160 (37%).  $m/z$  (M + H) 394.0260.  $\text{C}_{18}\text{H}_{18}\text{ONBrFS}$  requires 394.0271.

### **5-Fluoro-3-(6-hydroxy-hexylsulfanyl)-1-propyl-1,3-dihydroindol-2-one 19**

As for general procedure A. Glyoxamide **11** (233 mg, 1.11 mmol, 1 eq), on treatment with 6-mercapto-1-hexanol (151  $\mu\text{l}$ , 1.11 mmol, 1 eq), TFAA (1.42 ml, 10.0 mmol, 9 eq) and  $\text{BF}_3 \cdot \text{OEt}_2$  (685  $\mu\text{l}$ , 5.56 mmol, 5 eq), and purification by column chromatography using 15% EtOAc in petroleum ether as eluant, gave **19** (257 mg, 0.79 mmol, 71% from hydroxyamide, 2 steps) as a dark orange oil.  $\delta_{\text{H}}$  (500 MHz,  $\text{CDCl}_3$ ) 0.88 (3H, t,  $J = 7.6$  Hz,  $\text{CH}_3$ ), 1.22-1.34 (5H, m,  $2 \times \text{CH}_2$  and 1H of  $\text{CH}_2$ ), 1.42-1.34 (2H, m,  $\text{CH}_2$ ), 1.58-1.67 (3H, m,  $\text{CH}_2$  and 1H of  $\text{CH}_2$ ), 2.37-2.42 (1H, m, 1H of  $\text{CH}_2\text{S}$ ), 2.55-2.61 (1H, m, 1H of  $\text{CH}_2\text{S}$ ), 3.53-3.66 (3H, m,  $\text{CH}_2\text{O}$  and 1H of  $\text{CH}_2\text{N}$ ), 4.22 (1H, s,  $\text{CHS}$ ), 4.23-4.26 (1H, m, 1H of  $\text{CH}_2\text{N}$ ),

6.06 (1H, broad s, OH), 6.69 (1H, dd, J = 4.1, 8.5 Hz, ArH), 6.92 (1H, dt, J = 1.9, 8.5 Hz, ArH) and 7.07 (1H, J = 1.3, 2.9, 7.6 Hz).  $\delta_C$  (125 MHz, CDCl<sub>3</sub>) 11.3 (CH<sub>3</sub>), 20.5 (CH<sub>2</sub>), 25.0 (CH<sub>2</sub>), 27.9 (CH<sub>2</sub>), 28.1 (CH<sub>2</sub>), 28.4 (CH<sub>2</sub>), 29.5 (CH<sub>2</sub>), 41.6 (CH<sub>2</sub>OH), 44.9 (CHS), 68.6 (CH<sub>2</sub>N), 108.9 (ArCH, d, J = 7.5 Hz), 113.2 (ArCH, d, J = 30 Hz), 115.4 (ArCH, d, J = 28.75 Hz), 127.8 (ArC, d, J = 7.5 Hz), 139 (ArC), 159.2 (ArCF, d, J = 240 Hz) and 175.1 (C=O).  $\nu_{\max}/(\text{cm}^{-1})$  3528, 3419, 2935, 2863, 1785, 1716, 1611, 1489, 1454, 1347, 1165, 951 and 875.  $m/z$  (ES+ mode) 348 ((M+Na)<sup>+</sup> 100%), 343 (22%) and 326 ((M+H)<sup>+</sup> 63%).  $m/z$  (M+H) 326.1584, C<sub>17</sub>H<sub>25</sub>O<sub>2</sub>NFS requires 326.1585.

### **Methyl 3-(5-fluoro-2-oxo-1-propylindolin-3-ylsulfanyl) propanoate 20**

As for general procedure A. Glyoxamide **11** (197 mg, 0.93 mmol, 1 eq) on treatment with methyl-3-mercapto-propionate (101  $\mu$ l, 0.93 mmol, 1 eq), TFAA (1.19 ml, 8.39 mmol, 9 eq) and BF<sub>3</sub>•OEt<sub>2</sub> (574  $\mu$ l, 4.66 mmol, 5 eq) and purification by column chromatography using 20% EtOAc in petroleum ether as eluant, gave **20** (197 mg, 0.62 mmol, 67% from hydroxyamide, 2 steps) as a light orange oil.  $\delta_H$  (300 MHz, CDCl<sub>3</sub>) 0.98 (3H, t, J = 7.4 Hz, CH<sub>3</sub>), 1.53 (2H, sextet, J = 7.4 Hz, CH<sub>2</sub>), 2.63 (2H, t, J = 7.1 Hz, SCH<sub>2</sub>CH<sub>2</sub>C=O), 2.77-2.86 (1H, m, 1H of CH<sub>2</sub>S), 2.98-3.07 (1H, m, 1H of CH<sub>2</sub>S), 3.58-3.69 (2H, m, CH<sub>2</sub>N), 3.67 (3H, s, CO<sub>2</sub>CH<sub>3</sub>), 4.30 (1H, s, CHS), 6.74 (1H, dd, J = 4.1, 8.5 Hz, ArCH), 6.85 (1H, dt, J = 2.6, 8.5 Hz, ArCH) and 7.15 (1H, ddd, J = 0.9, 2.6, 7.8 Hz, ArCH).  $\delta_C$  (75 MHz, CDCl<sub>3</sub>) 11.6 (CH<sub>3</sub>), 20.9 (CH<sub>2</sub>), 25.2 (CH<sub>2</sub>S), 34.5 (CH<sub>2</sub>C=O), 42.1 (CH<sub>2</sub>N), 45.0 (CHS), 52.1 (CO<sub>2</sub>CH<sub>3</sub>), 109.3 (ArCH, d, J = 8.1 Hz), 113.5 (ArCH, d, J = 25.0 Hz), 115.6 (ArCH, d, J = 23.3 Hz), 127.6 (ArC, d, J = 8.3 Hz), 139.6 (ArC, d, J = 2.0 Hz), 159.4 (ArCF, d, J = 243.6 Hz), 172.2 (C=O amide) and 175.1 (C=O

ester).  $\nu_{\max}/(\text{cm}^{-1})$  2938, 1715 (C=O), 1613, 1448, 1345, 1165 and 981.  $m/z$  (CI<sup>+</sup> mode) 312 ((M<sup>+</sup> + H), 24%), 194 (100%), 136 (14%), 108 (15%), 72 (19%) and 60 (42%).  $m/z$  (M+H) 312.1066, C<sub>15</sub>H<sub>19</sub>O<sub>3</sub>NFS requires 312.1064.

### **5-Fluoro-3-ethylacetylsulfanyl-1-propyl-1,3-dihydroindol-2-one 21**

As for general procedure A. Glyoxamide **11** (146 mg, 0.70 mmol, 1 eq) on treatment with ethylthioglycolate (53  $\mu\text{l}$ , 0.49 mmol, 0.7 eq), TFAA (887  $\mu\text{l}$ , 6.28 mmol, 9 eq) and BF<sub>3</sub>•OEt<sub>2</sub> (488  $\mu\text{l}$ , 3.49 mmol, 5 eq) and after purification by column chromatography using 10% EtOAc in petroleum ether as eluant, gave **21** (150 mg, 0.44 mmol, 63% from hydroxyamide, 2 steps) as a yellow oil.  $\delta_{\text{H}}$  (300 MHz, CDCl<sub>3</sub>) 0.95 (3H, t, J = 7.4 Hz, CH<sub>3</sub>), 1.25 (3H, t, J = 7.2 Hz, CH<sub>3</sub>CH<sub>2</sub>), 1.68 (2H, m, CH<sub>2</sub>), 3.23 (1H, d, J = 15.6 Hz, 1H of CH<sub>2</sub>S), 3.64 (2H, t, J = 7.4 Hz, CH<sub>2</sub>N), 3.84 (1H, d, J = 15.6 Hz, 1H of CH<sub>2</sub>S), 4.17 (2H, q, J = 7.2 Hz, OCH<sub>2</sub>CH<sub>3</sub>), 4.53 (1H, s, CHS), 6.74 (1H, dd, J = 4.2, 8.4 Hz, ArCH), 6.98 (1H, dt, J = 2.4, 8.4 Hz, ArCH) and 7.15 (1H, ddd, J = 0.9, 2.7, 7.5 Hz, ArCH).  $\delta_{\text{C}}$  (75 MHz, CDCl<sub>3</sub>) 11.6 (CH<sub>3</sub>), 14.3 (CH<sub>3</sub>CH<sub>2</sub>O), 20.9 (CH<sub>2</sub>), 31.8 (CH<sub>2</sub>S), 42.1 (CH<sub>2</sub>N), 43.9 (CHS), 61.8 (OCH<sub>2</sub>CH<sub>3</sub>), 109.3 (ArCH, d, J = 8.0 Hz), 113.6 (ArCH, d, J = 24.9 Hz), 115.8 (ArCH, d, J = 23 Hz), 126.8 (ArC, d, J = 8.2 Hz), 139.7 (ArC, d, J = 2.1 Hz), 159.2 (ArCF, d, J = 241 Hz), 170.0 (C=O amide) and 174.9 (C=O ester).  $\nu_{\max}/(\text{cm}^{-1})$  2947, 1718 (C=O), 1486, 1276, 1130, 1026 and 813.  $m/z$  (EI<sup>+</sup> mode) 312 (M<sup>+</sup> 31%), 194 (100%), 136 (40%), 109 (21%) and 58 (13%).  $m/z$  (M+H) 312.1062, C<sub>15</sub>H<sub>19</sub>O<sub>3</sub>NFS requires 312.1064.

### **(2R)-2-Dibenzylamino-3-((3R/S)-5-fluoro-2-oxo-1-propyl-2,3-dihydro-1H-indol-3-ylsulfanyl)propionic acid methyl ester 22a**

As for general procedure A. Glyoxamide **11** (96 mg, 0.46 mmol, 1 eq) on treatment with 2(*R*)-methyl-2-(dibenzylamino)-3-mercaptopropanoate (144 mg, 0.46 mmol, 1 eq), TFAA (583  $\mu$ l, 4.13 mmol, 9 eq) and  $\text{BF}_3 \cdot \text{OEt}_2$  (282  $\mu$ l, 2.29 mmol, 5 eq) and purification by column chromatography using 20% EtOAc in petroleum ether as eluant, gave **22a** as an inseparable 1:1.5 mixture of diastereoisomers (120 mg, 0.23 mmol, 52% from hydroxyamide, 2 steps) as an oil.  $[\alpha]_{\text{D}} = -52.47$  ( $c = 5.1$ ,  $\text{CH}_2\text{Cl}_2$ ).  $\delta_{\text{H}}$  (500 MHz,  $\text{CDCl}_3$ ) 0.74-0.79 (6H, m,  $2 \times \text{CH}_3$ ), 1.33-1.40 (4H, m,  $2 \times \text{CH}_2$ ), 2.65-2.68 (1H, m, 1H of  $\text{CH}_2\text{CHS}$  one isomer), 2.79-2.85 (3H, m, 1H of  $\text{CH}_2\text{CHS}$  one isomer and  $\text{CH}_2\text{CHS}$  one isomer), 3.18 (1H, t,  $J = 7.4$  Hz,  $\text{SCHCH}_2$  one isomer), 3.37 (1H, d,  $J = 13.7$  Hz, 1H of  $\text{CH}_2\text{Ph}$  one isomer), 3.38-3.48 (4H, m, 1H of  $\text{NCH}_2$  both isomers,  $\text{SCHCH}_2$  one isomer, 1H of  $\text{CH}_2\text{Ph}$  one isomer), 3.51-3.57 (2H, m, 1H of  $\text{NCH}_2$  both isomers), 3.63 (3H, s,  $\text{CH}_3\text{OC}=\text{O}$  one isomer), 3.65 (3H, s,  $\text{CH}_3\text{OC}=\text{O}$  one isomer), 3.69 (1H, d,  $J = 13.7$  Hz, 1H of  $\text{CH}_2\text{Ph}$  one isomer), 3.75 (1H, d,  $J = 13.7$  Hz, 1H of  $\text{CH}_2\text{Ph}$  one isomer), 4.58 (1H, s,  $\text{CHS}$  one isomer), 4.72 (1H, s,  $\text{CHS}$  one isomer), 6.76-6.95 (8H, m,  $8 \times \text{ArCH}$ ) and 7.12-7.28 (18H, m,  $18 \times \text{ArCH}$ ).  $\delta_{\text{C}}$  (75 MHz,  $\text{CDCl}_3$ ) 11.3 ( $2 \times \text{CH}_3$ ), 20.9 ( $2 \times \text{CH}_2$ ), 29.4 ( $\text{CH}_2\text{CHS}$ , one isomer), 29.6 ( $\text{CH}_2\text{CHS}$ , one isomer), 51.7 ( $2 \times \text{CH}_3\text{O}$ ), 52.0 ( $2 \times \text{CH}_2\text{N}$ ), 54.5 ( $\text{CH}_2\text{Ph}$ , one isomer), 54.7 ( $\text{CH}_2\text{Ph}$  one isomer), 60.7 ( $\text{SCHCH}_2$ , one isomer), 61.2 ( $\text{SCHCH}_2$ , one isomer), 72.9 ( $\text{CHS}$ , one isomer), 73.2 ( $\text{CHS}$ , one isomer), 116.5 ( $\text{ArCH}$ , one isomer, d,  $J = 22.7$ ), 116.7 ( $\text{ArCH}$ , one isomer, d,  $J = 22.6$ ), 127.5 ( $2 \times \text{ArCH}$ ), 127.5 ( $2 \times \text{ArCH}$ ), 128.5 ( $4 \times \text{ArCH}$ ), 128.6 ( $4 \times \text{ArCH}$ ), 129.1 ( $4 \times \text{ArCH}$ ), 129.3 ( $4 \times \text{ArCH}$ ), 130.8 ( $4 \times \text{ArCH}$ ), 135.9 ( $2 \times \text{ArC}$ ), 139.1 ( $2 \times \text{ArC}$ ), 161.5 ( $2 \times \text{ArCF}$ ,  $J = 240.9$  Hz), 170.2 ( $\text{C}=\text{O}$  amide, one isomer), 170.3 ( $\text{C}=\text{O}$  amide, one isomer), 171.8 ( $\text{C}=\text{O}$  ester, one isomer) and 171.9 ( $\text{C}=\text{O}$  ester, one isomer).  $\nu_{\text{max}}/(\text{cm}^{-1})$  3402, 3029, 2947, 1729



(C=O), 1652, 1481, 1216, 1073 and 962.  $m/z$  (ES+ mode) 505 ((M+H) 82%), 382 (30%) and 264 (100%).  $m/z$  (M-H) 505.1968,  $C_{29}H_{30}FN_2O_3S$  requires 505.1956.

### **6-Methoxy-3-phenylsulfanyl-1-propyl-1,3-dihydroindol-2-one 23**

As for general procedure A. Glyoxamide **12** (250 mg, 1.13 mmol, 1 eq) on treatment with thiophenol (464  $\mu$ l, 4.52 mmol, 4 eq), TFAA (1.44 ml, 10.2 mmol, 9 eq) and  $BF_3 \cdot OEt_2$  (695  $\mu$ l, 5.65 mmol, 5 eq) and purification by column chromatography using 15% EtOAc in petroleum ether as eluant, gave **23** (158 mg, 0.50 mmol, 44% from hydroxyamide, 2 steps) as an oil (inseparable 5:1 mixture of regioisomers).  $\delta_H$  (500 MHz,  $CDCl_3$ ) 0.83 (3H, t,  $J = 7.4$  Hz,  $CH_3$  major), 0.88 (3H, t,  $J = 7.4$  Hz,  $CH_3$  minor), 1.37-1.55 (4H, m,  $CH_2$  both isomers), 3.34-3.48 (2H, m, 1H of  $CH_2N$  both isomers), 3.54-3.66 (2H, m, 1H of  $CH_2N$  both isomers), 3.71 (3H, s,  $OCH_3$  minor), 3.83 (3H, s,  $OCH_3$  major), 4.54 (1H, s,  $CHS$  major), 4.81 (1H, s,  $CHS$  minor), 6.27 (1H, d,  $J = 2.2$  Hz,  $ArH$  major), 6.44-6.46 (1H, m,  $ArH$  minor), 6.59 (1H, dd,  $J = 2.2, 8.3$  Hz,  $ArH$  major), 6.81-6.85 (1H, m,  $ArH$  minor) and 7.13-7.42 (12H, m,  $12 \times ArH$  both isomers).  $\delta_C$  (75 MHz,  $CDCl_3$ ) 11.4 ( $CH_3$  minor), 11.6 ( $CH_3$  of major), 20.8 ( $CH_2$  of minor isomer), 21.1 ( $CH_2$  major isomer), 42.1 ( $CH_2N$  both isomers), 49.1 ( $CHS$  major), 51.6 ( $CH_3O$  minor), 55.6 ( $CH_3O$  major), 58.2 ( $CHS$  minor), 96.7 ( $ArCH$  major), 101.9 ( $ArCH$  minor), 106.0 ( $ArCH$  minor), 106.4 ( $ArCH$  major), 113.9 ( $ArCH$  minor), 114.2 ( $ArCH$  minor), 118.4 ( $ArC$  major), 120.5 ( $ArC$  minor), 126.3 ( $ArCH$  major), 128.7 ( $ArCH$  major), 128.9 ( $2 \times ArCH$  major), 129.1 ( $ArCH$  major), 130.4 ( $ArCH$  minor), 130.6 ( $ArCH$  minor), 131.3 ( $2 \times ArCH$  minor), 133.5 ( $ArC$  minor), 133.8 ( $ArC$  major), 134.6 ( $ArCH$  major), 135.4 ( $ArC$  minor), 145.1 ( $ArC$  major), 161.0 ( $ArCOMe$  major), 168.0 ( $ArCOMe$  major) and 175.0 (C=O both isomers).  $\nu_{max}/(cm^{-1})$  3057, 2964,

2932, 1717 (C=O), 1622, 1501, 1467, 1371, 1268, 1131 and 982.  $m/z$  (ES+ mode)  
336 (M+H, 100%).  $m/z$  (M+Na) 336.1030,  $C_{18}H_{19}O_2NNaS$  requires 336.1029.

### **6-Methoxy-3-ethoxycarbonylmethylsulfanyl-1-propyl-1,3-dihydroindol-2-one**

#### **24**

As for general procedure A Glyoxamide **12** (235 mg, 0.80 mmol, 1 eq) on treatment with ethylthioglycolate (467  $\mu$ l, 4.26 mmol, 4 eq), TFAA (1.35 ml, 9.56 mmol, 9 eq) and  $BF_3 \cdot OEt_2$  (654  $\mu$ l, 5.31 mmol, 5 eq) and purification by column chromatography using 15% EtOAc in petroleum ether as eluant, gave **24** (136 mg, 0.42 mmol, 40% from hydroxyamide, 2 steps) as an oil (inseparable 5:1 mixture of regioisomers).  $\delta_H$  (500 MHz,  $CDCl_3$ ) 0.83 (6H, t,  $J = 7.5$  Hz,  $CH_3$  both isomers), 1.11-1.15 (6H, m,  $CH_3CH_2C=O$  both isomers), 1.53-1.59 (6H, m,  $CH_2$  both isomers), 3.12 (1H, d,  $J = 15.6$  Hz, 1H of  $CH_2S$  major), 3.25 (1H, d,  $J = 15.6$  Hz, 1H of  $CH_2S$  minor), 3.47-3.51 (2H, m,  $CH_2N$  both isomers), 3.68 (3H, s,  $CH_3O$  major), 3.70 (1H, d,  $J = 15.6$  Hz, 1H of  $CH_2S$  minor), 3.73 (1H, d,  $J = 15.6$  Hz, 1H of  $CH_2S$  major), 3.76 (3H, s,  $CH_3O$  minor), 3.99-4.04 (3H, m,  $C=OCH_2CH_3$  both isomers), 4.36 (1H, s,  $CHS$  major), 4.44 (1H, s,  $CHS$  minor), 6.27 (1H, d,  $J = 2.2$  Hz,  $ArCH$  major), 6.35 (1H, d,  $J = 7.8$  Hz,  $ArCH$  minor), 6.41 (1H, dd,  $J = 2.2, 8.2$  Hz,  $ArCH$  major), 6.47 (1H, d,  $J = 8.5$  Hz,  $ArCH$  minor) and 7.28 (1H, d,  $J = 8.2$  Hz,  $ArCH$  major).  $\delta_C$  (75 MHz,  $CDCl_3$ ) 11.6 ( $CH_3$  both isomers), 14.4 ( $CH_3CH_2C=O$  both isomers), 21.0 ( $CH_2$  major), 21.1 ( $CH_2$  minor), 31.7 ( $CH_2S$  major), 31.9 ( $CH_2S$  minor), 42.0 ( $CH_2N$  major), 42.2 ( $CH_2N$  minor), 42.5 ( $CHS$  minor) 43.4 ( $CHS$  major), 55.8 ( $CH_3O$  major), 56.0 ( $CH_3O$  minor), 61.6 ( $CH_3CH_2C=O$  minor), 61.7 ( $CH_3CH_2C=O$  major), 97.0 ( $ArCH$  major), 102.2 ( $ArCH$  minor), 106.2 ( $ArCH$  minor), 106.4 ( $ArCH$  major), 116.9 ( $ArC$  minor),

126.3 (ArCH major), 130.9 (ArCH minor), 156.7 (ArCOMe minor), 161.2 (ArCOMe major), 170.2 (C=O amide, minor), 170.3 (C=O amide, major), 175.3 (C=O ester, minor) and 176.0 (C=O ester, major).  $\nu_{\max}/(\text{cm}^{-1})$  2967, 2934, 2876, 1715 (C=O ester), 1622 (C=O amide), 1502, 1467, 1372, 1269, 1133, 1030, 984 and 896.  $m/z$  (CI<sup>+</sup> mode) 324 ((M+H)<sup>+</sup> 100%), 223 (18%) and 206 (44%).  $m/z$  (M+H) 324.1265, C<sub>16</sub>H<sub>22</sub>O<sub>4</sub>NS requires 324.1264.

### **1-((S)-1-Phenyl-1-ethyl)-3-ethylacetylsulfanyl-1,3-dihydro-indol-2-one 28**

As for general procedure A. Glyoxamide **27** (53 mg, 0.21 mmol, 1 eq), on treatment with ethylthioglycolate (23  $\mu\text{l}$ , 0.21 mmol, 1 eq), TFAA (177  $\mu\text{l}$ , 1.26 mmol, 6 eq) and BF<sub>3</sub>•OEt<sub>2</sub> (52  $\mu\text{l}$ , 0.42 mmol, 2 eq), and after purification by column chromatography using 10% EtOAc in petroleum ether as eluant, gave **28** (47 mg, 0.13 mmol, 64% from hydroxyamide, 2 steps) as a clear oil (1:1 mixture of diastereoisomers).  $[\alpha]_{\text{D}} = -117.80$  (c = 2.18, CH<sub>2</sub>Cl<sub>2</sub>).  $\delta_{\text{H}}$  (500 MHz, CDCl<sub>3</sub>) 1.19 (3H, t J = 7.3 Hz, CH<sub>3</sub> one isomer), 1.20 (3H, t J = 7.3 Hz, CH<sub>3</sub> one isomer), 1.76 (3H, d, 7.3 Hz, CH<sub>3</sub> one isomer), 1.77 (3H, d, 7.3 Hz, CH<sub>3</sub> one isomer), 3.22 (1H, d, J = 15.5 Hz, 1H of CH<sub>2</sub>S one isomer), 3.27 (1H, d, J = 15.5 Hz, 1H of CH<sub>2</sub>S one isomer), 3.84 (1H, d, J = 15.5 Hz, 1H of CH<sub>2</sub>S one isomer), 3.95 (1H, d, J = 15.5 Hz, 1H of CH<sub>2</sub>S one isomer), 4.06-4.13 (4H, m, CH<sub>2</sub>N both isomers), 4.56 (1H, s, CHS one isomer), 4.57 (1H, s, CHS one isomer), 5.77 (2H, sextet, J = 7.3 Hz, CH both isomers), 6.39-6.42 (2H, m, 2  $\times$  ArH both isomers), 6.91 (2H, t, J = 7.6 Hz, 2  $\times$  ArH both isomers), 6.98 (2H, t, J = 7.6 Hz, 2  $\times$  ArH both isomers) and 7.18-7.32 (12H, m, 12  $\times$  ArH both isomers).  $\delta_{\text{C}}$  (75 MHz, CDCl<sub>3</sub>) 14.4 (2  $\times$  CH<sub>3</sub>), 16.3 (CH<sub>2</sub>), 16.5 (CH<sub>2</sub>), 31.8 (CH<sub>2</sub>S), 32.0 (CH<sub>2</sub>S), 43.7 (CHS), 43.9 (CHS), 49.4 (CHCH<sub>3</sub>), 49.5 (CHCH<sub>3</sub>), 61.8 (2  $\times$  CH<sub>2</sub>N), 111.3 (2  $\times$  ArCH), 122.7 (2  $\times$  ArCH), 125.3 (ArCH), 125.3 (ArCH),

125.6 (ArCH), 125.7 (ArCH), 126.9 (4 × ArCH), 127.8 (2 × ArCH), 129.0 (2 × ArCH), 129.0 (2 × ArCH), 129.1 (2 × ArCH), 139.2 (2 × ArC), 139.2 (2 × ArC), 142.3 (2 × ArC), 170.3 (C=O amide), 170.3 (C=O amide), 175.4 (C=O ester) and 175.4 (C=O ester).  $\nu_{\max}/(\text{cm}^{-1})$  3057, 2930, 2983, 1712, 1608, 1482, 1467, 1386, 1347, 1266, 1184, 1084, 1026, 736 and 699.  $m/z$  (ES+ mode) 378 ((M+Na)<sup>+</sup> 100%) and 356 ((M+H)<sup>+</sup> 52%).  $m/z$  (M+H) 356.1318, C<sub>20</sub>H<sub>22</sub>O<sub>3</sub>NS requires 356.1315.

### **1-(6-Hydroxy-hexylsulfanyl)-3,4-methylenedioxy-3-propyl-1,3,4,5-tetrahydro-benzo[*d*]azepin-2-one 31**

As for general procedure B. Glyoxamide **29** (50 mg, 0.20 mmol, 1 eq) on treatment with 6-mercapto-1-hexanol (27  $\mu$ l, 0.20 mmol, 1 eq), TFAA (254  $\mu$ l, 1.80 mmol, 9 eq) and BF<sub>3</sub>•OEt<sub>2</sub> (123  $\mu$ l, 1.00 mmol, 5 eq) and after purification with 20% EtOAc in petroleum ether as eluant, gave **31** (51 mg, 0.14 mmol, 68% from hydroxyamide, 2 steps) as a clear oil.  $\delta_{\text{H}}$  (500 MHz, CDCl<sub>3</sub>) 0.86 (3H, t, J = 7.4 Hz, CH<sub>3</sub>), 1.32-1.41 (4H, m, 2 × CH<sub>2</sub>), 1.58-1.70 (6H, m, CH<sub>2</sub>CH<sub>3</sub> and 2 × CH<sub>2</sub>), 2.57-2.62 (1H, m, 1H of CH<sub>2</sub>), 2.72-2.78 (1H, m, 1H of CH<sub>2</sub>), 2.88-3.00 (3H, m, CH<sub>2</sub> and 1H of CH<sub>2</sub>), 3.13-3.22 (3H, m, CH<sub>2</sub> and 1H of CH<sub>2</sub>), (1H, m, 1H of NCH<sub>2</sub>CH<sub>2</sub>ArC), 4.28 (2H, t, J = 7.0 Hz, CH<sub>2</sub>N), 4.59 (1H, s, CHS), 4.66-4.71 (1H, m, 1H of NCH<sub>2</sub>CH<sub>2</sub>ArC), 5.84 (1H, d, J = 1.47 Hz, 1H of OCH<sub>2</sub>O), 5.85 (1H, d, J = 1.47 Hz, 1H of OCH<sub>2</sub>O), 6.44 (1H, s, ArCH) and 6.58 (1H, s, ArCH).  $\delta_{\text{C}}$  (125 MHz, CDCl<sub>3</sub>) 11.6 (CH<sub>3</sub>), 21.5 (CH<sub>2</sub>), 25.5 (CH<sub>2</sub>), 28.7 (CH<sub>2</sub>), 29.4 (CH<sub>2</sub>), 32.8 (CH<sub>2</sub>), 33.7 (CH<sub>2</sub>), 34.0 (CH<sub>2</sub>), 45.5 (CH<sub>2</sub>), 50.4 (CH<sub>2</sub>), 56.2 (CHS), 63.0 (CH<sub>2</sub>N), 101.5 (OCH<sub>2</sub>O), 110.1 (ArCH), 111.8 (ArCH), 125.8 (ArC), 131.1 (ArCH), 146.7 (ArCO), 147.7 (ArCO) and 170.3 (C=O).  $\nu_{\max}/(\text{cm}^{-1})$  3426, 2928, 1638, 1504, 1485, 1424, 1384, 1307, 1266, 1225, 1124 and 1038.  $m/z$  (ES+ mode)

402 (M+Na, 62%) and 380 (M+H, 100%).  $m/z$  (M+H) 380.1896, C<sub>20</sub>H<sub>30</sub>O<sub>4</sub>NS requires 380.1890.

**Pummerer-type cyclisation with sub-stoichiometric amounts of Sc(OTf)<sub>3</sub> – 21 and 5-fluoro-3-hydroxyl-1-propyl-1,3-dihydroindol-2-one 32**

To a stirred solution of glyoxamide **11** (112 mg, 0.54 mmol, 1 eq) was added ethylthioglycolate (59  $\mu$ l, 0.54 mmol, 1 eq) at room temperature. After 18 h, TFAA (453  $\mu$ l, 3.21 mmol, 6 eq) was added. After a further 1 h, Sc(OTf)<sub>3</sub> (132 mg, 0.27 mmol, 0.5 eq) was added. After 1 h, the reaction was quenched with aqueous NaHCO<sub>3</sub> (15 ml), the organic layer was washed with aqueous NaHCO<sub>3</sub> (2  $\times$  15 ml), dried (Na<sub>2</sub>SO<sub>4</sub>), filtered and concentrated *in vacuo* to give an orange oil. Purification by column chromatography using 15% EtOAc in petroleum ether as eluant, gave **32** (19 mg, 0.09 mmol, 17%) as an oil and **21** (122 mg, 0.39 mmol, 72% from hydroxyamide, 2 steps) as an oil. For **32**:  $\delta_H$  (500 MHz, CDCl<sub>3</sub>) 0.89 (3H, t, J = 7.4 Hz, CH<sub>3</sub>), 1.62 (2H, sextet, J = 7.4 Hz, CH<sub>2</sub>), 3.49-3.62 (2H, m, CH<sub>2</sub>N), 4.90-5.10 (1H, broad s, OH), 5.05 (1H, s, CHOH), 6.69 (1H, dd, J = 4.0, 8.7 Hz, ArCH), 6.94 (1H, dt, J = 2.65, 8.9 Hz, ArCH) and 7.15 (1H, dd, J = 2.5, 7.6 Hz, ArCH).  $\delta_C$  (125 MHz, CDCl<sub>3</sub>) 11.3 (CH<sub>3</sub>), 20.6 (CH<sub>2</sub>), 41.9 (CH<sub>2</sub>N), 69.8 (CHOH), 109.4 (ArCH, d, J = 8.8 Hz), 113.5 (ArCH, d, J = 23.8 Hz), 115.8 (ArCH, d, J = 22.5 Hz), 129.0 (ArC, d, J = 8.8 Hz), 139. (ArC, d, J = 1.25 Hz), 159.5 (ArCF, d, J = 240 Hz) and 177.4 (C=O ester).  $\nu_{max}/(cm^{-1})$  3417, 2927, 1725 (C=O), 1489, 1463, 1339, 1264, 1196 and 937.  $m/z$  (EI<sup>+</sup> mode) 209 (M<sup>+</sup>, 35%), 151 (100%), 134 (30%), 122 (42%), 95 (60%), 83 (58%), 75 (73%) and 49 (80%).  $m/z$  (M-H) 208.0759, C<sub>11</sub>H<sub>11</sub>O<sub>2</sub>NF requires 208.0768.

### Cross-over experiment – 14 and 19

To a stirred solution of glyoxamide **9** (43 mg, 0.26 mmol, 1 eq) in CH<sub>2</sub>Cl<sub>2</sub> (3 ml) was added ethylthioglycolate (29  $\mu$ l, 0.26 mmol, 1 eq) and the reaction mixture stirred at room temperature for 18 h. In a separate reaction flask, 6-mercapto-1-hexanol (38  $\mu$ l, 0.26 mmol, 1 eq) was added to a solution of glyoxamide **11** (59 mg, 0.28 mmol, 1 eq) in CH<sub>2</sub>Cl<sub>2</sub> (3 ml) at room temperature and the reaction also stirred for 18 h. The two reaction mixtures were then combined and the resulting solution stirred for 2.5 h. TFAA (475  $\mu$ l, 3.36 mmol, 12 eq) was added followed by BF<sub>3</sub>•OEt<sub>2</sub> (138  $\mu$ l, 1.12 mmol, 4 eq) after a further 1 h. After 1 h the reaction was quenched with aqueous saturated NaHCO<sub>3</sub> (10 ml), the organic layers washed with aqueous saturated NaHCO<sub>3</sub> (2  $\times$  10 ml), dried (Na<sub>2</sub>SO<sub>4</sub>) and concentrated *in vacuo*. Purification by column chromatography using 20% EtOAc in petroleum ether as eluant gave **19** (73 mg, 0.22 mmol, 80%) and **14** (47 mg, 0.17 mmol, 68%).

### 3,5-Bis-phenylsulfanyl-1,7-dipropyl-5,7-dihydro-1H,3H-pyrrolo[3,2-f]indole-2,6-dione **43**

As for general procedure C. *Bis*-glyoxamide **39** (140 mg, 0.45 mmol, 1 eq) on treatment with thiophenol (99  $\mu$ l, 0.90 mmol, 2 eq), TFAA (1.15 ml, 8.12 mmol, 18 eq) and BF<sub>3</sub>•OEt<sub>2</sub> (555  $\mu$ l, 4.51 mmol, 10 eq), and after purification by column chromatography using 10% EtOAc in petroleum ether as eluant gave **43** (104 mg, 0.21 mmol, 47% from *bis*-hydroxyamide, 2 steps) as an oil (1:1.5 mixture of diastereoisomers).  $\delta_{\text{H}}$  (500 MHz, CDCl<sub>3</sub>) 0.71-0.76 (6H, m, 2  $\times$  CH<sub>3</sub>), 1.31-1.38 (4H, m, 2  $\times$  CH<sub>2</sub>), 3.28-3.33 (2H, m, NCH<sub>2</sub>), 3.46-3.55 (2H, m, NCH<sub>2</sub>), 4.44 (2H, s, 2  $\times$  CHS major), 4.48 (2H, s, 2  $\times$  CHS minor), 5.91 (1H, s, ArCH major), 5.93 (1H, s, ArCH minor), 7.09-7.13 (8H, m, 8  $\times$  ArCH), 7.16-7.21 (4H, m, 4  $\times$  ArCH),

7.29-7.32 (8H, m, 8 × ArCH), 7.38 (1H, s, ArCH major) and 7.40 (1H, s, ArCH minor).  $\delta_C$  (75 MHz, CDCl<sub>3</sub>) 11.6 (2 × CH<sub>3</sub>), 20.9 (2 × CH<sub>2</sub>), 42.1 (2 × CH<sub>2</sub>N), 49.3 (2 × CHS major), 49.4 (2 × CHS minor), 90.7 (ArCH), 119.8 (ArC), 120.0 (ArC), 122.8 (ArCH), 129.0 (2 × ArCH), 129.0 (2 × ArCH), 129.1 (2 × ArCH), 130.9 (ArC), 131.2 (ArC), 134.5 (2 × ArCH), 134.8 (2 × ArCH), 144.8 (ArC), 145.1 (ArC), 174.7 (C=O) and 174.9 (C=O).  $\nu_{\max}/(\text{cm}^{-1})$  3058, 2931, 2662, 1705 (C=O), 1597, 1465, 1368, 1195, 1087 and 894.  $m/z$  (ES<sup>+</sup> mode) 811.3 (43%), 589.7 (22%), 511.2 ((M+Na)<sup>+</sup>, 47%), 495.2 (30%), 417.4 (100%), 395.3 (27%) and 379.3 (16%).  $m/z$  (M+H) 489.1659, C<sub>28</sub>H<sub>29</sub>O<sub>2</sub>N<sub>2</sub>S<sub>2</sub> requires 489.1665.

**3,5-Bis-ethoxycarbonylmethylsulfanyl-1,7-dipropyl-5,7-dihydro-1H,3H-pyrrolo[3,2-f]indole-2,6-dione 44**

As for general procedure C. *Bis*-glyoxamide **39** (167 mg, 0.54 mmol, 1 eq) on treatment with ethylthioglycolate (118  $\mu$ l, 1.08 mmol, 2 eq), TFAA (1.37 ml, 9.68 mmol, 18 eq), and BF<sub>3</sub>•OEt<sub>2</sub> (662  $\mu$ l, 5.38 mmol, 10 eq), and after purification by column chromatography using 30% EtOAc in petroleum ether as eluant gave **44** (138 mg, 0.27 mmol, 50% from *bis*-hydroxyamide, 2 steps) as an oil (1:1 mixture of diastereoisomers).  $\delta_H$  (300 MHz, CDCl<sub>3</sub>) 0.92 (6H, t, J = 7.2 Hz, 2 × CH<sub>3</sub>), 1.22 (6H, t, J = 7.2 Hz, 2 × CH<sub>3</sub>CH<sub>2</sub>O), 1.68 (4H, sextet, J = 7.3 Hz, 2 × CH<sub>2</sub>), 3.19-3.23 (2H, overlapping doublets, J = 15.6 Hz, 2 × 1H of CH<sub>2</sub>S both isomers), 3.60-3.64 (4H, m, J = 7.4 Hz, 2 × CH<sub>2</sub>N), 3.84 (2H, overlapping doublets, J = 15.6 Hz, 2 × 1H of CH<sub>2</sub>S), 4.09-4.14 (4H, overlapping quartets, J = 7.2 Hz, 2 × OCH<sub>2</sub>CH<sub>3</sub>), 4.49 (2H, s, 2 × CHS), 6.24 (1H, s, ArCH) and 7.35 (1H, s, ArCH).  $\delta_C$  (75 MHz, CDCl<sub>3</sub>) 11.7 (2 × CH<sub>3</sub>), 14.4 (2 × CH<sub>3</sub>CH<sub>2</sub>), 21.1 (2 × CH<sub>2</sub>), 31.8 (2 × CH<sub>2</sub>S), 42.1 (2 × CH<sub>2</sub>N), 43.5 (2 × CHS), 61.9 (2 × CH<sub>2</sub>CH<sub>3</sub>), 91.3 (ArCH), 118.4 (2 × ArC),

122.8 (2 × ArC), 145.3 (ArCH), 170.2 (2 × C=O amide) and 175.9 (2 × C=O ester).  $\nu_{\max}/(\text{cm}^{-1})$  2954, 1712 (C=O ester), 1604 (C=O amide), 1473, 1369, 1273, 1089 and 896.  $m/z$  (ES+ mode) 935 (32%), 772 (42%), 651 (62%), 531 (M+Na 71%), 427 (100%) and 261 (48%).  $m/z$  (M+Na) 531.1598,  $\text{C}_{24}\text{H}_{32}\text{O}_6\text{N}_2\text{NaS}_2$  requires 531.1594.

**3,5-Bis-(3,3,4,4,5,5,6,6,7,7,8,8,9,9,10,10,10-heptafluorodecylsulfanyl)-1,7-dipropyl-5,7-dihydro-1H, 3H, pyrrolo [3,2-f] indol-2,6-dione 45**

As for general procedure C. *Bis*-glyoxamide **39** (519 mg, 1.71 mmol, 1 eq) on treatment with 1H, 1H, 2H, 2H-perfluorodecane-1-thiol (1.00 ml, 3.42 mmol, 2 eq), TFAA (4.31 ml, 30.5 mmol, 18 eq) and  $\text{BF}_3 \cdot \text{Et}_2\text{O}$  (2.37 ml, 16.9 mmol, 10 eq), and after purification by FSPE gave **45** (1.16 g, 0.95 mmol, 56% from *bis*-hydroxyamide, 2 steps) as a dark solid (1:1 mixture of diastereoisomers). mp 93.2 – 99.5 (recrystallised from petroleum ether/EtOAc).  $\delta_{\text{H}}$  (500 MHz,  $\text{CDCl}_3$ )  $\delta$  0.89 (6H, t,  $J = 7.4$  Hz, 2 ×  $\text{CH}_3$ ), 1.62 (4H, m, 2 ×  $\text{CH}_2$ ), 2.08-2.36 (4H, m, 2 ×  $\text{CF}_2\text{CH}_2$ ), 2.70-2.74 (2H, m, 2 × 1H from  $\text{CH}_2\text{S}$ ), 2.84-2.88 (2H, m, 2 × 1H from  $\text{CH}_2\text{S}$ ), 3.54-3.64 (4H, m, 2 ×  $\text{NCH}_2$ ), 4.24 (2H, s,  $\text{CHS}$ ), 6.26 (1H, s, 1 × ArH) and 7.31 (1H, s, 1 × ArH).  $\delta_{\text{C}}$  (75 MHz,  $\text{CDCl}_3$ ) 11.5 (2 ×  $\text{CH}_3$ ), 21.1 (2 ×  $\text{CH}_2$ ), 21.4 (2 ×  $\text{CH}_2\text{S}$ ), 32.1 (2 ×  $\text{CF}_2\text{CH}_2$ , t,  $J = 21.7$  Hz), 42.2 (2 ×  $\text{CH}_2\text{N}$ ), 44.6 ( $\text{CHS}$ ), 44.7 ( $\text{CHS}$ ), 91.3 (ArCH), 118.8 (2 × ArC), 122.5 (ArCH), 145.2 (2 × ArC) and 175.6 (2 × C=O).  $\nu_{\max}/(\text{cm}^{-1})$  2971, 2359, 1715 (C=O), 1621, 1489, 1372 and 1205.  $m/z$  (AP+ mode) 1227 (28%) and 749 (100%).

**1,7-Dibenzyl-3,5-bis(benzylsulfanyl)-5,7-dihydropyrrolo[3,2-f]indole-2,6(1H,3H)-dione 46**



As for general procedure C. *Bis*-glyoxamide **40** (390 mg, 0.98 mmol, 1 eq) on treatment with benzyl thiol (229  $\mu$ l, 1.95 mmol, 2 eq), TFAA (2.52 ml, 17.6 mmol, 18 eq) and  $\text{BF}_3 \cdot \text{OEt}_2$  (1.36 ml, 9.75 mmol, 10 eq) and after purification by flash chromatography using 30% EtOAc in petroleum ether as eluant gave **46** (373mg, 0.61 mmol, 62% from *bis*-hydroxyamide, 2 steps) as a yellow solid (1:1 mixture of diastereoisomers). mp 70.5–71.6 °C (recrystallised from petroleum ether/EtOAc).  $\delta_{\text{H}}$  (500 MHz,  $\text{CDCl}_3$ ) 3.78 (1H, d,  $J = 13.3$  Hz, 1H from  $\text{SCH}_2$ ), 3.79 (1H, d,  $J = 13.3$  Hz, 1H from  $\text{SCH}_2$ ), 4.14-4.25 (4H, m,  $2 \times 1$ H from  $\text{SCH}_2$  and  $2 \times \text{SCH}$ ), 4.68-4.80 (4H, m,  $2 \times \text{NCH}_2$ ), 6.02 (1H, s, *ArH*), 6.02 (1H, s, *ArH*) and 7.17-7.38 (22H, m,  $22 \times \text{ArH}$ ).  $\delta_{\text{C}}$  (75 MHz,  $\text{CDCl}_3$ ) 34.6 ( $2 \times \text{SCH}_2$ ), 43.0 ( $2 \times \text{SCH}$ ), 44.2 ( $2 \times \text{NCH}_2$ ), 92.8 (*ArCH*), 118.9 ( $2 \times \text{ArC}$ ), 122.2 (*ArCH*), 127.5 ( $2 \times \text{ArCH}$ ), 127.6 ( $2 \times \text{ArCH}$ ), 128.7 ( $4 \times \text{ArCH}$ ), 129.1 ( $4 \times \text{ArCH}$ ), 129.4 ( $4 \times \text{ArCH}$ ), 129.5 ( $4 \times \text{ArCH}$ ), 135.5 ( $2 \times \text{ArC}$ ), 137.4 ( $2 \times \text{ArC}$ ), 144.1 ( $2 \times \text{ArC}$ ) and 176.2 ( $2 \times \text{C=O}$ ).  $\nu_{\text{max}}/(\text{cm}^{-1})$  ( $\text{CH}_2\text{Cl}_2$  evaporated film) 3060, 3029, 2929, 1712 ( $\text{C=O}$ ), 1619, 1493 and 1160.  $m/z$  ( $\text{CI}^+$  mode) 613 ( $\text{M}^+$ , 1%), 489 (30%), 367 (72%), 296 (30%), 264 (50%), 210 (44%), 193 (45%), 108 (100%), 91 (50%) and 79 (38%).  $m/z$  ( $\text{M}$ ) 612.1973,  $\text{C}_{38}\text{H}_{32}\text{O}_2\text{N}_2\text{S}_2$  requires 612.1978.

**1,7-Dibenzyl-3,5-bis(phenylsulfanyl)-5,7-dihydropyrrolo[3,2-f]indole-2,6(1H,3H)-dione 47**

As for general procedure C. *Bis*-glyoxamide **40** (332 mg, 0.83 mmol, 1 eq) on treatment with thiophenol (170  $\mu$ l, 1.66 mmol, 2 eq), TFAA (2.14 ml, 14.9 mmol, 18 eq), and  $\text{BF}_3 \cdot \text{OEt}_2$  (1.16 ml, 8.29 mmol, 10 eq), and after purification by column chromatography using 30% EtOAc in petroleum ether as eluant gave **47** (294 mg, 0.37 mmol, 45% from *bis*-hydroxyamide, 2 steps) as a brown solid (1:1

mixture of diastereoisomers). mp 71.9–72.9 °C (recrystallised from petroleum ether/EtOAc).  $\delta_{\text{H}}$  (500 MHz,  $\text{CDCl}_3$ ) 4.30 (2H, d,  $J = 15.7$  Hz,  $2 \times 1\text{H}$  from  $\text{NCH}_2$ ), 4.40-4.59 (2H, m,  $2 \times \text{CHS}$ ), 4.74 (2H, d,  $J = 15.7$  Hz,  $2 \times 1\text{H}$  from  $\text{NCH}_2$ ), 5.64-5.65 (1H, m,  $\text{ArH}$ ), 6.69-7.33 (20H, m,  $\text{ArH}$ ) and 7.56 (1H, s,  $\text{ArH}$ ).  $\delta_{\text{C}}$  (75 MHz,  $\text{CDCl}_3$ ) 44.4 ( $2 \times \text{NCH}_2$ ), 49.5 ( $2 \times \text{CHS}$ ), 92.9 ( $\text{ArCH}$ ), 119.9 ( $2 \times \text{ArC}$ ), 122.6 ( $\text{ArCH}$ ), 127.4 ( $2 \times \text{ArCH}$ ), 127.8 ( $2 \times \text{ArCH}$ ), 129.1 ( $4 \times \text{ArCH}$ ), 129.3 ( $4 \times \text{ArCH}$ ), 130.8 ( $2 \times \text{ArC}$ ), 131.1 ( $2 \times \text{ArC}$ ), 134.7 ( $4 \times \text{ArCH}$ ), 135.0 ( $4 \times \text{ArCH}$ ), 144.1 ( $2 \times \text{ArC}$ ) and 174.7 ( $2 \times \text{C=O}$ ).  $\nu_{\text{max}}/(\text{cm}^{-1})$  ( $\text{CH}_2\text{Cl}_2$  evaporated film) 3060, 3033, 2921, 1717 ( $\text{C=O}$ ), 1620, 1492 and 1161.  $m/z$  (ES+ mode) 644 (80%), 607 (M+Na, 100%), 582 (30%) and 549 (52%).  $m/z$  (M–H) 583.1520,  $\text{C}_{36}\text{H}_{27}\text{O}_2\text{N}_2\text{S}_2$  requires 583.1519.

**1,5-Dihexyl-3,7-bis-phenylsulfanyl-5,7-dihydro-1H,3H-pyrrolo[2,3-f]indole-2,6-dione 48**

As for general procedure C. *Bis*-glyoxamide **41** (497 mg, 1.28 mmol, 1 eq) on treatment with thiophenol (260  $\mu\text{l}$ , 2.65 mmol, 2 eq), TFAA (3.30 ml, 23.1 mmol, 18 eq), and  $\text{BF}_3 \cdot \text{OEt}_2$  (1.79 ml, 12.8 mmol, 10 eq) and after purification by column chromatography using 20% EtOAc in petroleum ether as eluant gave **48** (396 mg, 0.69 mmol, 54% from *bis*-hydroxyamide, 2 steps) as an oil (>5:1 mixture of regioisomers).  $\delta_{\text{H}}$  (500 MHz,  $\text{CDCl}_3$ ) 0.82 (12H, t,  $J = 7.2$  Hz,  $4 \times \text{CH}_3$ ), 1.15-1.33 (32H, m,  $4 \times \text{CH}_2\text{CH}_2\text{CH}_2\text{CH}_2\text{CH}_3$ ), 3.30-3.70 (8H, m,  $4 \times \text{CH}_2\text{N}$ ), 4.45 (2H, s,  $2 \times \text{CHS}$  major), 4.46 (2H, s,  $2 \times \text{CHS}$  major), 4.47 (2H, s,  $2 \times \text{CHS}$  minor), 4.48 (2H, s,  $2 \times \text{CHS}$  minor), 6.62 (2H, s,  $2 \times \text{ArCH}$  major), 6.64 (2H, s,  $2 \times \text{ArCH}$  major), 6.64 (2H, s,  $2 \times \text{ArCH}$  minor), 6.68 (2H, s,  $2 \times \text{ArCH}$  minor) and 6.99-7.31 (20H, m,  $20 \times \text{ArCH}$ ).  $\delta_{\text{C}}$  (125 MHz,  $\text{CDCl}_3$ ) 14.1 ( $\text{CH}_3$ ), 22.5 ( $\text{CH}_2$ ), 22.6 ( $\text{CH}_2$ ), 26.5

(CH<sub>2</sub>), 26.6 (CH<sub>2</sub>), 27.2 (CH<sub>2</sub>), 27.5 (CH<sub>2</sub>), 29.7 (CH<sub>2</sub>), 31.5 (CH<sub>2</sub>), 40.4 (CH<sub>2</sub>N), 49.5 (CHS), 106.1 (ArCH), 106.2 (ArCH), 106.3 (ArCH), 106.4 (ArCH), 127.1 (ArC), 127.2 (ArC), 127.3 (ArC), 128.4 (ArCH), 128.6 (ArCH), 128.7 (ArCH), 128.8 (ArCH), 128.9 (ArCH), 129.0 (ArCH), 130.5 (ArC), 134.0 (ArCH), 134.1 (ArCH), 134.5 (ArCH), 134.8 (ArCH), 138.9 (ArC), 139.0 (ArC), 139.2 (ArC), 173.0 (C=O), 173.2 (C=O) and 173.4 (C=O).  $\nu_{\max}/(\text{cm}^{-1})$  2929, 2857, 1711, 1473, 1344, 1169, 1126 and 866.  $m/z$  (ES+ mode) 595 (M+Na, 100%), 573 (M+H, 54%), 534 (100%) and 308 (42%).  $m/z$  (M+H) 573.2619, C<sub>34</sub>H<sub>41</sub>O<sub>2</sub>N<sub>2</sub>S<sub>2</sub> requires 573.2604.

**1,5-Dihexyl-3,7-bis-ethoxycarbonylmethylsulfanyl-5,7-dihydro-1H,3H  
pyrrolo[2,3-f]indole-2,6-dione 49**

As for general procedure C. *Bis*-glyoxamide **41** (471 mg, 1.21 mmol, 1 eq) on treatment with ethylthioglycolate (270  $\mu\text{l}$ , 2.43 mmol, 2 eq), TFAA (3.13 ml, 21.8 mmol, 18 eq), and BF<sub>3</sub>•OEt<sub>2</sub> (1.70 ml, 12.1 mmol, 10 eq) and after purification by column chromatography using 20% EtOAc in petroleum ether as eluant gave **49** (392mg, 0.66 mmol, 55% from *bis*-hydroxyamide, 2 steps) as a dark red solid (>5:1 mixture of regioisomers). mp 85.0–86.3 °C (recrystallised from petroleum ether/EtOAc).  $\delta_{\text{H}}$  (500 MHz, CDCl<sub>3</sub>) 0.88-0.93 (12H, m, 2 × CH<sub>2</sub>CH<sub>2</sub>CH<sub>3</sub> both isomers), 1.30 (12H, t, J = 7.1 Hz, 2 × OCH<sub>2</sub>CH<sub>3</sub> both isomers), 1.29-1.40 (24H, m, 2 × CH<sub>2</sub>CH<sub>2</sub>CH<sub>2</sub>CH<sub>3</sub> both isomers), 1.67-1.69 (8H, m, 2 × NCH<sub>2</sub>CH<sub>2</sub> both isomers), 3.31 (2H, d, J = 15.7 Hz, 2 × 1H from CH<sub>2</sub>S one isomer), 3.33 (2H, d, J = 15.7 Hz, 2 × 1H from CH<sub>2</sub>S one isomer), 3.67-3.75 (8H, m, 2 × NCH<sub>2</sub> both isomers), 4.02 (2H, d, J = 15.7 Hz, 2 × 1H from CH<sub>2</sub>S one isomer), 4.06 (2H, d, J = 15.7 Hz, 2 × 1H from CH<sub>2</sub>S one isomer), 4.18-4.21 (8H, m, 2 × OCH<sub>2</sub>CH<sub>3</sub> both

isomers), 4.59 (2H, s, 2 × *CHS* one isomer), 4.61 (2H, s, 2 × *CHS* one isomer) and 6.96 (4H, s, 2 × *ArH* both isomers).  $\delta_C$  (75 MHz,  $CDCl_3$ ) 14.2 ( $CH_3$ ), 14.4 ( $OCH_2CH_3$ ), 22.8 ( $CH_2$ ), 26.8 ( $CH_2$ ), 27.6 ( $NCH_2CH_2$ ), 31.6 ( $CH_2$ ), 31.7 ( $CH_2S$ ), 40.7 ( $NCH_2$ ), 43.8 (*CHS*), 61.9 ( $OCH_2CH_3$ ), 106.9 (*ArCH*), 126.1 (*ArC*), 139.4 (*ArC*), 170.2 ( $C=O$ , amide) and 174.7 ( $C=O$ , ester).  $\nu_{max}/(cm^{-1})$  ( $CH_2Cl_2$  evaporated film) 2956, 2930, 2858, 2360, 1737 ( $C=O$ ), 1687, 1477, 1261 and 1129.  $m/z$  (ES+ mode) 615.5 (( $M+Na$ )<sup>+</sup>, 100%), 593.2 (( $M+H$ )<sup>+</sup>, 12%), 543.6 (20%) and 536.4 (24%).  $m/z$  ( $M+Na$ ) 615.2525,  $C_{30}H_{44}O_6N_2NaS_2$  requires 615.2533.

**1,5-Dihexyl-3,7-bis-(6-hydroxy-hexylsulfanyl)-5,7-dihydro-1H,3H-pyrrolo[2,3-*f*]indole-2,6-dione 50**

As for general procedure C. *Bis*-glyoxamide **38** (225 mg, 0.58 mmol, 1 eq) on treatment with 6-mercapto-1-hexanol (158  $\mu$ l, 1.16 mmol, 2 eq), TFAA (1.47 ml, 10.44 mmol, 18 eq), and  $BF_3 \cdot OEt_2$  (713  $\mu$ l, 5.80 mmol, 10 eq) and after purification by column chromatography using 20% EtOAc in petroleum ether as eluant gave **50** (219 mg, 0.35 mmol, 61% from *bis*-hydroxyamide, 2 steps) as a dark oil (3:1 mixture of regioisomers).  $\delta_H$  (300 MHz,  $CDCl_3$ ) 0.91 (12H, t,  $J = 7.0$  Hz, 8 ×  $CH_3$ ), 1.28-1.46 (40H, m, 4 ×  $CH_2CH_2CH_2CH_3$  and 4 ×  $CH_2CH_2$ ), 1.55-1.80 (24H, m, 4 ×  $CH_2CH_2N$  and 4 ×  $CH_2CH_2$ ), 2.56-2.89 (8H, m, 4 ×  $CH_2S$ ), 3.61-3.84 (8H, m, 4 ×  $CH_2O$ ), 4.31 (2H, s, 2 × *CHS* major), 4.32 (2H, s, 2 × *CHS* of minor), 4.34-4.38 (8H, m, 4 ×  $CH_2N$ ), 6.92 (2H, s, 2 × *ArCH* minor) and 6.93 (2H, s, 2 × *ArCH* major).  $\delta_C$  (75 MHz,  $CDCl_3$ ) 14.2 ( $CH_3$ ), 22.8 ( $CH_2$ ), 25.4 ( $CH_2$ ), 26.8 ( $CH_2$ ), 27.6 ( $CH_2$ ), 28.2 ( $CH_2$ ), 28.7 ( $CH_2$ ), 29.1 ( $CH_2S$ ), 29.2 ( $CH_2$ ), 31.7 ( $CH_2$ ), 40.7 ( $CH_2O$ ), 45.1 (*CHS*), 45.3 (*CHS*), 62.3 ( $CH_2N$ ), 106.5 (*ArCH*),

127.0 (ArC), 127.1 (ArC), 139.2 (ArC), 139.3 (ArC), 175.0 (C=O) and 175.1 (C=O).  $\nu_{\max}/(\text{cm}^{-1})$  3449, 2929, 2856, 2361, 1717, 1474, 1341, 1168 and 1053.  $m/z$  (ES- mode) 619 (M-H 12%), 502 (37%), 416 (55%) and 284 (100%).  $m/z$  (M+H) 621.3767,  $\text{C}_{34}\text{H}_{56}\text{O}_4\text{N}_2\text{S}_2$  requires 621.3754.

### **3,7-Bis(4-bromo-benzylsulfanyl)-1,5-dihexyl-5,7-dihydro-1H,3H-pyrrolo[2,3-f]indole-2,6-dione 51**

As for general procedure C. *Bis*-glyoxamide **41** (225 mg, 0.58 mmol, 1 eq) on treatment with 4-bromobenzyl mercaptan (236 mg, 1.16 mmol, 2 eq), TFAA (1.47 ml, 10.44 mmol, 18 eq), and  $\text{BF}_3 \cdot \text{OEt}_2$  (713  $\mu\text{l}$ , 5.80 mmol, 10 eq) and after purification by column chromatography using 15% EtOAc in petroleum ether as eluant gave **51** (238 mg, 0.31 mmol, 54% from *bis*-hydroxyamide, 2 steps) as a red solid (>5:1 mixture of regioisomers and a 1:1 mixture of diastereoisomers). mp 181.1–188.6 °C (recrystallised from petroleum ether/EtOAc).  $\delta_{\text{H}}$  (300 MHz,  $\text{CDCl}_3$ ) 0.90-0.94 (12H, m, 4  $\times$   $\text{CH}_3$  both isomers), 1.26-1.45 (24H, m, 12  $\times$   $\text{CH}_2$  both isomers), 1.60-1.69 (8H, m, 4  $\times$   $\text{CH}_2$  both isomers), 3.55-3.70 (8H, m, 4  $\times$   $\text{CH}_2\text{N}$  both isomers), 3.70 (2H, d,  $J = 13.5$  Hz, 2  $\times$  1H of  $\text{CH}_2\text{S}$  one isomer), 3.74 (2H, d,  $J = 13.5$  Hz, 2  $\times$  1H of  $\text{CH}_2\text{S}$  one isomer), 4.16 (2H, s, 2  $\times$   $\text{CHS}$  one isomer), 4.18 (2H, s, 2  $\times$   $\text{CHS}$  one isomer), 4.19 (2H, d,  $J = 13.5$  Hz, 2  $\times$  1H of  $\text{CH}_2\text{S}$  one isomer), 4.25 (2H, d,  $J = 13.5$  Hz, 2  $\times$  1H of  $\text{CH}_2\text{S}$  one isomer), 6.69 (2H, s, 2  $\times$  ArH one isomer), 6.70 (2H, s, 2  $\times$  ArH one isomer), 7.24 (4H, d,  $J = 8.5$  Hz, 4  $\times$  ArH one isomer), 7.27 (4H, d,  $J = 8.5$  Hz, 4  $\times$  ArH one isomer), 7.42 (4H, d,  $J = 8.5$  Hz, 4  $\times$  ArH one isomer) and 7.45 (4H, d,  $J = 8.5$  Hz, 4  $\times$  ArH one isomer).  $\delta_{\text{C}}$  (75 MHz,  $\text{CDCl}_3$ ) 14.3 ( $\text{CH}_3$ ), 22.8 ( $\text{CH}_2$ ), 26.8 ( $\text{CH}_2$ ), 27.7 ( $\text{CH}_2$ ), 31.7 ( $\text{CH}_2$ ), 33.8 ( $\text{CH}_2\text{S}$ ), 33.9 ( $\text{CH}_2\text{S}$ ), 40.6 ( $\text{CH}_2\text{N}$ ), 43.4 ( $\text{CHS}$ ), 43.7 ( $\text{CHS}$ ),

106.6 (ArCH), 121.5 (ArC), 126.2 (ArC), 126.4 (ArC), 131.2 (ArC), 131.8 (ArC), 131.9 (ArC), 136.6 (ArC), 136.7 (ArC), 139.2 (ArC), 174.7 (C=O) and 174.9 (C=O).  $\nu_{\max}/(\text{cm}^{-1})$  2926, 2857, 1691 (C=O), 1474, 1350, 1172, 1071 and 1012.  $m/z$  (AP+ mode) 757 (M+H, 22%), 556 (100%) and 356 (24%).  $m/z$  (M+Na) 779.0960,  $\text{C}_{36}\text{H}_{42}\text{Br}_2\text{O}_2\text{N}_2\text{S}_2\text{Na}$  requires 779.0947.

**3,7-Bis(3,3,4,4,5,5,6,6,7,7,8,8,9,9,10,10,10-heptafluorodecylthio)-1,5-dihexyl-5,7-dihydropyrrolo[2,3-f]indole-2,6(1H,3H)-dione 52**

As for general procedure C. *Bis*-glyoxamide **41** (154 mg, 0.39 mmol, 1 eq) on treatment with 1H, 1H, 2H, 2H-perfluorodecane-1-thiol (232  $\mu\text{l}$ , 0.78 mmol, 2 eq), TFAA (992  $\mu\text{l}$ , 7.02 mmol, 18 eq), and  $\text{BF}_3 \cdot \text{OEt}_2$  (480  $\mu\text{l}$ , 3.90 mmol, 10 eq) and after purification by flash chromatography using 15% EtOAc in petroleum ether as eluant gave **52** (291 mg, 0.22 mmol, 57%) as a 2:1 mixture of regioisomers. A pure sample of the major regioisomer (1:1 mixture of diastereoisomers) was obtained as a light brown solid after further column chromatography (85 mg, 0.06 mmol, 17%). mp 135.8–140.8 °C (recrystallised from petroleum ether/EtOAc).  $\delta_{\text{H}}$  (500 MHz,  $\text{CDCl}_3$ ) 0.82 (12H, t,  $J = 7.1$  Hz,  $2 \times \text{CH}_3$ ), 1.17-1.33 (24H, m,  $4 \times \text{CH}_2\text{CH}_2\text{CH}_2\text{CH}_3$ ), 1.56-1.64 (8H, m,  $\text{CH}_2\text{CH}_2\text{N}$ ), 2.29-2.42 (8H, m,  $2 \times \text{CF}_2\text{CH}_2$ ), 2.68-2.95 (8H, m,  $4 \times \text{CH}_2\text{S}$ ), 3.54-3.74 (8H, m,  $2 \times \text{CH}_2\text{N}$ ), 4.26 (2H, s,  $2 \times \text{CHS}$  one isomer), 4.27 (2H, s,  $2 \times \text{CHS}$  one isomer), 6.84 (2H, s,  $2 \times \text{ArH}$  one isomer) and 6.85 (2H, s,  $2 \times \text{ArH}$  one isomer).  $\delta_{\text{C}}$  (75 MHz,  $\text{CDCl}_3$ ) 13.8 ( $\text{CH}_3$ ), 22.5 ( $\text{CH}_2$ ), 26.5 ( $\text{CH}_2$ ), 16.6 ( $\text{CH}_2$ ), 27.3 ( $\text{CH}_2$ ), 29.7 ( $\text{CH}_2$ ), 31.9 ( $\text{CH}_2\text{CF}_2$ , t,  $J = 21.9$  Hz), 40.6 ( $\text{CH}_2$ ), 45.1 ( $\text{CHS}$ ), 45.3 ( $\text{CHS}$ ), 106.5 (ArCH), 106.5 (ArCH), 126.4 (ArC), 139.2 (ArC), 139.3 (ArC) and 174.1 (C=O).  $\nu_{\max}/(\text{cm}^{-1})$  3049, 2931, 2860, 1695 (C=O), 1472, 1346, 1203, 1147,

1087, 957 and 870.  $m/z$  (AP+ mode), 1311.8 (15%), 879.3 (62%), 833.3 (100%), 401.2 (52%) and 355.8 (20%).

### **1,5-Dihexyl-5,7-dihydro-1H,3H-pyrrolo[2,3-*f*]indole-2,6-dione 53 from 51**

As for general procedure D. Compound **51** (49 mg, 0.06 mmol, 1 eq) on treatment with SmI<sub>2</sub> (2.80 ml of a 0.1 M solution in THF, 4.4 eq) and after purification by column chromatography using 30% EtOAc in petroleum ether as eluant gave **53** (17 mg, 0.06 mmol, 81%) as a grey solid. See data reported earlier.

### ***N*-(2-Benzenesulfonylethyl)phenyl amine 55**

Aniline (1.37 ml, 15.0 mmol, 1 eq), phenyl vinylsulfone (2.52 g, 15.0 mmol, 1 eq) and acetic acid (0.09 ml, 1.5 mmol, 0.1 eq) were placed in a microwave vessel with a magnetic stirrer and sealed. The reaction mixture was heated to 200 °C for 20 min and the cooled mixture was purified by column chromatography using 20 % EtOAc in petroleum ether as eluant to give **55** as a white solid (2.97 g, 11.4 mmol, 76 %). mp 76–78 °C (recrystallised from MeOH).  $\delta_{\text{H}}$  (400 MHz, CDCl<sub>3</sub>) 3.25 (2H, t,  $J = 6.3$  Hz, NCH<sub>2</sub>), 3.47 (2H, t,  $J = 6.3$  Hz, CH<sub>2</sub>SO<sub>2</sub>), 6.43 (2H, d,  $J = 7.6$  Hz, ArCH), 6.63 (1H, t,  $J = 7.3$  Hz, ArCH), 7.04 (2H, dd,  $J = 8.5, 7.3$  Hz, ArCH), 7.43-7.46 (2H, m, ArCH), 7.55 (1H, tt,  $J = 7.6, 1.6$  Hz, ArCH), 7.78-7.81 (2H, m, ArCH).  $\delta_{\text{C}}$  (125 MHz, CDCl<sub>3</sub>) 37.9 (NCH<sub>2</sub>), 54.8 (CH<sub>2</sub>SO<sub>2</sub>), 113.4 (2 × ArCH), 118.7 (ArCH), 128.0 (2 × ArCH), 129.4 (2 × ArCH), 129.5 (2 × ArCH), 134.0 (ArCH), 139.1 (ArCN), 146.2 (ArCSO<sub>2</sub>).  $\nu_{\text{max}}/\text{cm}^{-1}$  2967, 2385, 2877, 1603, 1086 (S=O).  $m/z$  (ES<sup>-</sup> mode) 261 (M, 15%), 260 (M<sup>+</sup>, 85%), 155 (10%).  $m/z$  (MNa<sup>+</sup>) 284.0715, C<sub>14</sub>H<sub>15</sub>O<sub>2</sub>NNaS requires 284.0716.

### ***N*-(2-Benzenesulfonylethyl)-2-hydroxy-*N*-phenylacetamide 57**

To a solution of **55** (2.85 g, 11.0 mmol, 1 eq) and acetoxyacetic acid (1.55 g, 13.0 mmol, 1.2 eq) in CH<sub>2</sub>Cl<sub>2</sub> (90 ml) were added *N*-(3-dimethylaminopropyl)-*N*-ethylcarbodiimide hydrochloride (2.51 g, 13.0 mmol, 1.2 eq) and 1-hydroxybenzotriazole hydrate (0.29 g, 2.2 mmol, 0.2 eq). The reaction was allowed to stir for 18 h at room temperature, quenched with 1 M HCl (50 ml) and extracted with CH<sub>2</sub>Cl<sub>2</sub> (3 × 50 ml). The combined organic layers were then dried (Na<sub>2</sub>SO<sub>4</sub>) and concentrated *in vacuo*. The crude was taken on to the next step without further purification.

The crude acetoxyamide was dissolved in a suspension of K<sub>2</sub>CO<sub>3</sub> (6.10 g, 44.0 mmol, 4 eq) in MeOH (80 ml) and H<sub>2</sub>O (40 ml) and allowed to stir for 4 h. H<sub>2</sub>O (40 ml) was added to the reaction mixture and the organic layer was extracted with EtOAc (3 × 50 ml), dried (Na<sub>2</sub>SO<sub>4</sub>) and concentrated *in vacuo*. The crude mixture was purified by column chromatography using 60 % EtOAc in petroleum ether as eluant to give **57** as a clear oil (2.35 g, 7.37 mmol, 67 % over 2 steps). δ<sub>H</sub> (400 MHz, CDCl<sub>3</sub>) 3.10 (1H, br s, OH), 3.37-3.42 (2H, m, CH<sub>2</sub>SO<sub>2</sub>), 3.73 (2H, s, HOCH<sub>2</sub>), 4.09-4.11 (2H, m, NCH<sub>2</sub>), 7.12-7.15 (2H, m, ArCH), 7.39-7.46 (3H, m, ArCH), 7.56-7.59 (2H, m, ArCH), 7.68 (1H, tt, J = 7.6, 1.2 Hz, ArCH), 7.91 (2H, d, J = 7.3 Hz, ArCH). δ<sub>C</sub> (100 MHz, CDCl<sub>3</sub>) 43.8 (NCH<sub>2</sub>), 53.1 (SO<sub>2</sub>CH<sub>2</sub>), 60.9 (HOCH<sub>2</sub>), 128.1 (2 × ArCH), 128.3 (2 × ArCH), 129.6 (2 × ArCH), 129.7 (ArCH), 130.6 (ArCH), 134.6 (2 × ArCH), 138.8 (ArC), 138.9 (ArC) 172.6 (C=O). ν<sub>max</sub>/cm<sup>-1</sup> 3237 (OH), 2961, 2359, 2341, 1654, 1494, 1446, 1260, 1087 (S=O). (ES<sup>+</sup> mode) 320 (MH<sup>+</sup>, 80%), 219 (10%). *m/z* (MH<sup>+</sup>) 320.0946, C<sub>16</sub>H<sub>18</sub>O<sub>4</sub>NS requires 320.0951.

### ***N*-(2-Benzenesulfonylethyl)-*p*-tolylamine 56**



*p*-Toluidine (0.20 g, 1.87 mmol, 1.2 eq.), phenylvinylsulfone (0.26 g, 1.55 mmol, 1 eq) and acetic acid (0.01 ml, 1.55 mmol, 0.1 eq) were placed in a microwave vessel with a magnetic stirrer and sealed. The reaction mixture was heated to 200 °C for 20 min and the cooled mixture was purified by column chromatography using 20 % EtOAc in petroleum ether as eluant to give **56** as a brown, waxy solid (0.29 g, 1.04 mmol, 67 %). mp 70-75 °C (recrystallised from MeOH).  $\delta_{\text{H}}$  (400 MHz, CDCl<sub>3</sub>) 2.13 (3H, s, Me), 3.28 (2H, t, J = 6.0 Hz, CH<sub>2</sub>NH), 3.50 (2 H, t, J = 6.0 Hz, CH<sub>2</sub>SO<sub>2</sub>), 3.92 (1H, br s, NH), 6.37-6.40 (2 H, m, 2 × ArCH), 6.88-6.92 (2 H, m, 2 × ArCH), 7.49-7.52 (2 H, m, 2 × ArCH), 7.61 (1H, tt, J = 7.6, 1.3 Hz, ArCH), 7.83 (2 H, m, 2 × ArCH).  $\delta_{\text{C}}$  (100 MHz, CDCl<sub>3</sub>) 20.4 (Me), 38.1 (CH<sub>2</sub>NH), 54.8 (CH<sub>2</sub>SO<sub>2</sub>), 113.4 (2 × ArCH), 127.8 (ArCMe), 128.0 (2 × ArCH), 129.5 (2 × ArCH), 129.9 (2 × ArCH), 134.0 (ArCH), 139.1 (ArCNH), 144.2 (ArCSO<sub>2</sub>).  $\nu_{\text{max}}/\text{cm}^{-1}$  3390 (NH), 1084 (S=O). *m/z* (EI<sup>+</sup> mode) 275 (M, 30%), 133 (85%), 132 (55%), 120 (100%), 77 (30%). *m/z* (M) 275.0976, C<sub>15</sub>H<sub>17</sub>O<sub>2</sub>NS requires 275.0975.

### ***N*-(2-Benzenesulfonylethyl)-2-hydroxy-*N-p*-tolyl-acetamide **58****

To a solution of **56** (1.79 g, 6.51 mmol, 1 eq) and acetoxyacetic acid (0.92 g, 7.82 mmol, 1.2 eq) in CH<sub>2</sub>Cl<sub>2</sub> (50 ml) were added *N*-(3-dimethylaminopropyl)-*N*-ethylcarbodiimide hydrochloride (1.50 g, 7.82 mmol, 1.2 eq) and 1-hydroxybenzotriazole hydrate (0.18 g, 1.3 mmol, 0.2 eq). The reaction was allowed to stir for 18 h at room temperature, quenched with 1 M HCl (30 ml) and extracted with CH<sub>2</sub>Cl<sub>2</sub> (3 × 50 ml). The combined organic layers were then dried (Na<sub>2</sub>SO<sub>4</sub>) and concentrated *in vacuo*. The crude was taken on to the next step without further purification.

The crude acetoxyamide was dissolved in a suspension of K<sub>2</sub>CO<sub>3</sub> (3.60 g, 26.0

mmol, 4 eq) in MeOH (40 ml) and H<sub>2</sub>O (20 ml) and allowed to stir for 4 h. H<sub>2</sub>O (20 ml) was added to the reaction mixture and the organic layer was extracted with EtOAc (3 × 40 ml), dried (Na<sub>2</sub>SO<sub>4</sub>) and concentrated *in vacuo*. The crude mixture was purified by column chromatography using 60 % EtOAc in petroleum ether as eluant to give **58** as a white, crystalline solid (1.55 g, 4.60 mmol, 71 % over 2 steps). mp 104-106 °C (recrystallised from MeOH).  $\delta_{\text{H}}$  (400 MHz, CDCl<sub>3</sub>) 2.34 (3H, s, Me), 3.12 (1H, t, J = 4.8 Hz, OH), 3.31-3.34 (2H, m, CH<sub>2</sub>N), 3.68 (2H, d, J = 4.8 Hz, CH<sub>2</sub>OH), 4.00-4.04 (2H, m, CH<sub>2</sub>SO<sub>2</sub>), 6.94-6.97 (2H, m, 2 × ArCH), 7.19 (2H, d, J = 7.8 Hz, 2 × ArCH), 7.53-7.57 (2H, m, 2 × ArCH), 7.64 (1H, tt, J = 7.6, 1.2 Hz, ArCH), 7.86-7.89 (2H, m, 2 × ArCH).  $\delta_{\text{C}}$  (100 MHz, CDCl<sub>3</sub>) 21.2 (Me), 43.6 (CH<sub>2</sub>SO<sub>2</sub>), 53.0 (CH<sub>2</sub>N), 60.6 (CH<sub>2</sub>OH), 127.7 (2 × ArCH), 128.1 (2 × ArCH), 129.5 (2 × ArCH), 131.0 (2 × ArCH), 134.1 (ArCH), 135.8 (ArC-Me), 138.7 (ArC-N), 139.6 (ArC-SO<sub>2</sub>), 172.5 (C=O).  $\nu_{\text{max}}/\text{cm}^{-1}$  3447 (OH), 1643 (C=O), 1086 (S=O).  $m/z$  (CI<sup>+</sup> mode) 334 (M<sup>+</sup>, 100%), 275 (50%), 192 (10%), 132 (55%), 119 (35%), 77 (30%).  $m/z$  (M) 333.1026, C<sub>17</sub>H<sub>19</sub>O<sub>4</sub>NS requires 333.1029.

**1-(2-Benzenesulfonylethyl)-3-(3,3,4,4,5,5,6,6,7,7,8,8,9,9,10,10,10-heptadecafluorodecylsulfanyl)-5-methyl-1,3-dihydroindol-2-one 60**

To a solution of oxalyl chloride (0.43 ml, 4.93 mmol, 1.1 eq) in CH<sub>2</sub>Cl<sub>2</sub> (15 ml) was added DMSO (0.64 ml, 8.97 mmol, 2 eq) at -78 °C. After 10 min, **58** (1.49 g, 4.48 mmol, 1 eq.) in CH<sub>2</sub>Cl<sub>2</sub> (15 ml) was added. After a further 1 h, Et<sub>3</sub>N (3.12 ml, 22.0 mmol, 5 eq) was added and the reaction allowed to warm to room temperature. After 3.5 h, NaHCO<sub>3</sub> (30 ml) was added to the reaction mixture and the organic layer was extracted with CH<sub>2</sub>Cl<sub>2</sub> (3 × 30 ml), then the organic layers were dried (MgSO<sub>4</sub>) and concentrated *in vacuo* to give the crude glyoxamide,

which was used without further purification.

To the crude glyoxamide in  $\text{CH}_2\text{Cl}_2$  (72 ml) was added 3,3,4,4,5,5,6,6,7,7,8,8,9,9,10,10,10-heptafluoro-decane-1-thiol (0.93 ml, 3.14 mmol, 0.7 eq) and the reaction stirred for 18 h at room temperature. Trifluoroacetic anhydride (5.70 ml, 40.3 mmol, 9 eq) was added, stirred for 1 h, then  $\text{BF}_3 \cdot \text{OEt}_2$  (2.76 ml, 22.4 mmol, 5 eq) was added and the reaction mixture was left for 3 h. The reaction mixture was quenched with  $\text{NaHCO}_3$  (70 ml), extracted with  $\text{CH}_2\text{Cl}_2$  ( $3 \times 50$  ml), the organic layers dried ( $\text{Na}_2\text{SO}_4$ ) and concentrated *in vacuo*. The crude mixture was purified using FSPE to give **60** as a white solid (1.48 g, 1.87 mmol, 60 % over 2 steps). mp 104-107 °C (from MeOH).  $\delta_{\text{H}}$  (400 MHz,  $\text{CDCl}_3$ ) 2.28 (5H, m, Ar-Me and  $\text{CH}_2\text{C}_8\text{F}_{17}$ ), 2.68-2.75 (1H, m, SCHH), 2.84-2.91 (1H, m, SCHH), 3.32-3.39 (1H, m, NCHH), 3.43-3.50 (1H, m, NCHH), 4.01-4.04 (3H, m,  $\text{CH}_2\text{SO}_2$  and  $\text{CHC}=\text{O}$ ), 6.73 (1H, d,  $J = 8.4$  Hz, ArCH), 7.06-7.10 (2H, m,  $2 \times$  ArCH), 7.46-7.50 (2H, m,  $2 \times$  ArCH), 7.60 (1H, tt,  $J = 7.6, 1.0$  Hz, ArCH), 7.81-7.84 (2H, m,  $2 \times$  ArCH).  $\delta_{\text{C}}$  (100 MHz,  $\text{CDCl}_3$ ) 21.0 (Me), 21.2 (SCH<sub>2</sub>), 31.8 ( $\text{CH}_2\text{C}_8\text{F}_{17}$ ), 34.4 ( $\text{CH}_2\text{SO}_2$ ), 44.6 ( $\text{CHC}=\text{O}$ ), 52.4 ( $\text{CH}_2\text{N}$ ), 108.4 (ArCH), 124.9 (ArC), 126.2 (ArCH), 127.9 ( $2 \times$  ArCH), 129.5 ( $2 \times$  ArCH), 130.0 (ArCH), 133.4 (ArC), 134.1 (ArCH), 138.7 (ArC), 139.6 (ArC), 175.0 (C=O).  $\nu_{\text{max}}/\text{cm}^{-1}$  1716 (C=O), 1083 (S=O), 1234 (C-F).  $m/z$  (ES- mode) 792 (M- 100 %), 281 (40 %).

**1-(2-Benzenesulfonylethyl)-3-(3,3,4,4,5,5,6,6,7,7,8,8,9,9,10,10,10-heptafluorodecylsulfanyl)-5-methyl-3-(2-nitrobenzyl)-1,3-dihydroindol-2-one **62****

To a solution of **60** (1.42 g, 1.80 mmol, 1 eq) in DMF (28 ml) was added  $\text{K}_2\text{CO}_3$

(1.24 g, 9.00 mmol, 5 eq) and 2-nitrobenzyl bromide (1.16 g, 5.39 mmol, 3 eq) at room temperature and the reaction mixture was allowed to stir for 18 h. H<sub>2</sub>O (30 ml) was added and the mixture extracted with Et<sub>2</sub>O (3 × 30 ml). The organic layer was washed with H<sub>2</sub>O (5 × 20 ml), dried (Na<sub>2</sub>SO<sub>4</sub>) and concentrated *in vacuo*. The crude mixture was purified using FSPE to give **62** as a clear, viscous oil (1.37 g, 1.47 mmol, 82 %).  $\delta_{\text{H}}$  (400 MHz, CDCl<sub>3</sub>) 2.04-2.17 (2H, m, CH<sub>2</sub>C<sub>8</sub>F<sub>17</sub>), 2.26 (3H, s, Me), 2.53-2.65 (2H, m, CH<sub>2</sub>SO<sub>2</sub>), 2.87-2.94 (1H, m, SCHH), 3.04-3.11 (1H, m, SCHH), 3.59 (1H, d, J = 13.6 Hz, CHHAr), 3.73-3.80 (1H, m, CHHN), 3.88-3.95 (1H, m, CHHN), 4.03 (1H, d, J = 13.6 Hz, CHHAr), 6.51 (1H, d, J = 8.1 Hz, ArCH), 6.92 (1H, d, J = 1.3 Hz, ArCH), 7.00 (1H, d, J = 8.1 Hz, ArCH), 7.21 (2H, dt, J = 6.3, 2.2 Hz, 2 × ArCH), 7.32 (1H, dt, J = 7.5, 1.5 Hz, ArCH), 7.54-7.62 (3H, m, 3 × ArCH), 7.66 (1H, tt, J = 7.5, 1.3 Hz, ArCH), 7.85-7.88 (2H, m, 2 × ArCH).  $\delta_{\text{C}}$  (100 MHz, CDCl<sub>3</sub>) 20.0 (CH<sub>2</sub>SO<sub>2</sub>), 21.0 (Me), 31.3 (CH<sub>2</sub>C<sub>8</sub>F<sub>17</sub>), 33.8 (CH<sub>2</sub>N), 37.5 (CH<sub>2</sub>Ar), 52.3 (SCH<sub>2</sub>), 55.2 (C), 108.1 (ArCH), 124.8 (ArCH), 125.7 (ArCH), 127.2 (ArC), 128.0 (2 × ArCH), 128.4 (ArCH), 129.3 (ArC), 129.6 (2 × ArCH), 130.2 (ArCH), 132.2 (ArCH), 133.5 (ArCH), 134.1 (ArCH), 134.3 (ArC), 138.1 (ArC), 138.5 (ArC), 150.0 (ArC), 175.5 (C=O).  $\nu_{\text{max}}/\text{cm}^{-1}$  1710s (C=O), 1528 (NO<sub>2</sub>), 1351 (NO<sub>2</sub>), 1086 (S=O). *m/z* (ES<sup>+</sup> mode) 951 (MNa<sup>+</sup>, 100 %).

#### **11-(2-Benzenesulfonylethyl)-3-methyl-11H-10,11-diaza-benzo[b]fluorene 64**

To a solution of SmI<sub>2</sub> in THF (60.3 ml, 0.1 M, 6.03 mmol, 9 eq) was added a thoroughly degassed solution of **62** (0.622 g, 6.70 mmol, 1 eq) in THF (6 ml) and MeOH (3 ml). The solution was allowed to stir for 4 h and then exposed to air. Saturated aqueous Na<sub>2</sub>S<sub>2</sub>O<sub>3</sub> (50 ml) was added, the organic layer extracted with Et<sub>2</sub>O (3 × 30 ml), the combined organic layers dried (Na<sub>2</sub>SO<sub>4</sub>) and concentrated *in*

*vacuo*. The crude aniline was purified by column chromatography using 50 % EtOAc in petroleum ether as eluant. The product was then directly dissolved in a MeOH:AcOH (1:1) mix (10 ml) and heated to 100 °C for 18 h. K<sub>2</sub>CO<sub>3</sub> was added to the mixture until basic pH was reached, the organic layer was extracted with EtOAc (3 × 10 ml), the combined organic layers dried (Na<sub>2</sub>SO<sub>4</sub>) and concentrated *in vacuo*. The crude mixture was purified by column chromatography using 20 % EtOAc in petroleum ether as eluant to give **64** as a light green solid (0.16 g, 0.40 mmol, 60 %). mp 153-154 °C (recrystallised from hexane). δ<sub>H</sub> (400 MHz, CDCl<sub>3</sub>) 2.58 (3H, s, Me), 3.96 (2H, t, J = 7.1 Hz, CH<sub>2</sub>SO<sub>2</sub>), 4.88 (2H, t, J = 7.1 Hz, CH<sub>2</sub>N), 7.27-7.35 (3H, m, 3 × ArCH), 7.40-7.49 (3H, m, 3 × ArCH), 7.70-7.76 (3H, m, 3 × ArCH), 7.88 (1H, dt, J = 1.7, 0.8 Hz, ArCH), 7.97 (1 H, dd, J = 8.1, 1.5 Hz, ArCH), 8.03 (1H, dd, J = 8.6, 0.5 Hz, ArCH), 8.56 (1 H, s, ArCH). δ<sub>C</sub> (100 MHz, CDCl<sub>3</sub>) 21.3 (Me), 35.9 (CH<sub>2</sub>N), 53.1 (CH<sub>2</sub>SO<sub>2</sub>), 108.7 (ArCH), 109.9 (ArC), 118.1 (ArC), 120.7 (ArC), 121.7 (ArCH), 123.2 (ArCH), 124.3 (ArC), 127.2 (ArCH), 127.5 (ArCH), 127.6 (2 × ArCH), 128.5 (ArCH), 128.9 (2 × ArCH), 129.4 (ArCH), 130.0 (ArC), 133.5 (ArCH), 138.8 (ArC), 139.5 (ArCH), 146.5 (ArC), 152.0 (ArC). ν<sub>max</sub>/cm<sup>-1</sup> 1612 (C=C), 1446 (C=C), 1086 (S=O). *m/z* (ES<sup>+</sup> mode) 401 (MH<sup>+</sup>, 100 %).

### 3-Methylneocryptolepine **66**

Compound **64** (0.02 g, 0.05 mmol, 1 eq) was suspended in THF (0.5 ml) and potassium *tert*-butoxide (0.017 g, 0.15 mmol, 3 eq) was added at -78 °C. The reaction mixture was allowed to stir for 2 h. 2,2,2-Trifluoroethanol (0.015 ml, 0.2 mmol, 4 eq) was then added and the reaction was allowed to stir for 5 min, before methyl iodide (0.031 ml, 0.5 mmol, 10 eq) was added. The reaction was then heated under reflux for

18 h. The crude mixture was concentrated *in vacuo*, dissolved in CH<sub>2</sub>Cl<sub>2</sub> (3 ml) and NaHCO<sub>3</sub> (3 ml) was added and the organic layer extracted with CH<sub>2</sub>Cl<sub>2</sub> (3 × 3 ml). The organic layer was dried (Na<sub>2</sub>SO<sub>4</sub>), concentrated *in vacuo* and purified by column chromatography using EtOAc as eluant to give **66** as a dark orange/red solid (0.0086 g, 0.035 mmol, 70 %). mp 147-148 °C (recrystallised from hexane). δ<sub>H</sub> (400 MHz, CDCl<sub>3</sub>) 2.46 (3H, s, Me), 4.29 (3H, s, N-Me), 7.29-7.32 (1H, m, ArCH), 7.35-7.39 (1H, m, ArCH), 7.58 (1H, d, J = 8.0, ArCH), 7.68-7.70 (2H, m, 2 × ArCH), 7.78 (1H, dt, J = 18, 0.7 Hz, ArCH), 7.91 (1H, d, J = 7.8, ArCH), 8.42 (1H, s, ArCH). δ<sub>C</sub> (100 MHz, CDCl<sub>3</sub>) 21.5 (Me), 33.1 (N-Me), 114.1 (ArCH), 117.3 (ArCH), 120.8 (ArC), 121.3 (ArCH), 121.8 (ArCH), 124.0 (ArC), 127.9 (ArCH), 128.3 (ArC), 129.3 (ArC), 130.0 (ArCH), 130.3 (ArCH), 130.5 (ArCH), 137.0 (ArC), 153.2 (ArC), 156.0 (ArC). ν<sub>max</sub>/cm<sup>-1</sup> 2920, 1646, 1496, 1200, 748. *m/z* (CI<sup>+</sup> mode) 247 (MH<sup>+</sup>, 30 %), 246 (M, 20 %), 186 (30 %), 124 (50 %), 110 (70 %), 93 (100 %), 77 (60 %), 57 (60 %). *m/z* 246.1153, C<sub>17</sub>H<sub>14</sub>N<sub>2</sub> requires 246.1152.
